# Supplementary material
Source: Royal Society of Chemistry journal article supplement (doi:10.1039/d6qi00525j)
Supplement: d6qi00525j1.pdf [file d6qi00525j1.pdf]

## Supporting Information

### A Hybrid Pyridine-Thioether Macrocycle to Chelate Theranostic Copper and Silver Radioisotopes

Marianna Tosato<sup>1,2,\*</sup>, Fortuna Ponte<sup>3</sup>, Sara Franchi<sup>4</sup>, Nora V. May<sup>5</sup>, Mikael Jensen<sup>6</sup>, Helmut Mäcke<sup>7</sup>, Valerio Di Marco<sup>4</sup>, Laura Pigani<sup>8</sup>, Erika Ferrari<sup>8</sup>, Emilia Sicilia<sup>3</sup>, Mattia Asti<sup>9</sup> and Caterina F. Ramogida<sup>1,2,\*</sup>

<sup>1</sup> Department of Chemistry, Simon Fraser University, V5A 4Y8 Burnaby, British Columbia, Canada

<sup>2</sup> Life Sciences, TRIUMF, V6T 2A3 Vancouver, British Columbia, Canada

<sup>3</sup> Department of Chemistry and Chemical Technologies, University of Calabria, 87036 Cosenza, Italy

<sup>4</sup> Department of Chemical Sciences, University of Padova, 35131 Padova, Italy

<sup>5</sup> Centre for Structural Science, Research Centre for Natural Sciences, 1117 Budapest, Hungary

<sup>6</sup> The Hevesy Laboratory, Department of Health Technology, Technical University of Denmark, 4000 Roskilde, Denmark

<sup>7</sup> Department of Nuclear Medicine, University Hospital Freiburg, D-79106 Freiburg, Germany

<sup>8</sup> Department of Chemical and Geological Sciences, University of Modena and Reggio Emilia, 41125 Modena, Italy

<sup>9</sup> Radiopharmaceutical Chemistry Laboratory, Nuclear Medicine Unit, AUSL-IRCCS Reggio Emilia, 42122 Reggio Emilia, Italy

**Corresponding authors:** [marianna\\_tosato@sfu.ca](mailto:marianna_tosato@sfu.ca); [cfr@sfu.ca](mailto:cfr@sfu.ca)

## **Supporting Figures**

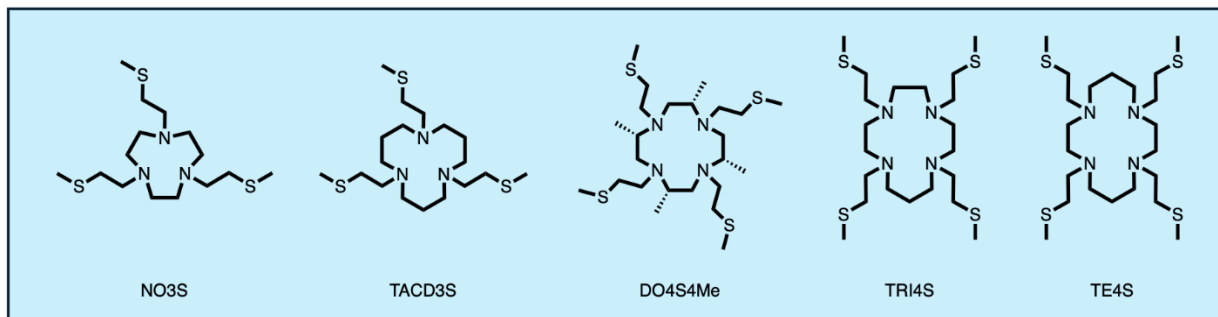

**Figure S1.** Chemical structures of previously developed sulfur-containing chelators for soft radiometals characterized by different ring topologies.<sup>1,2</sup>

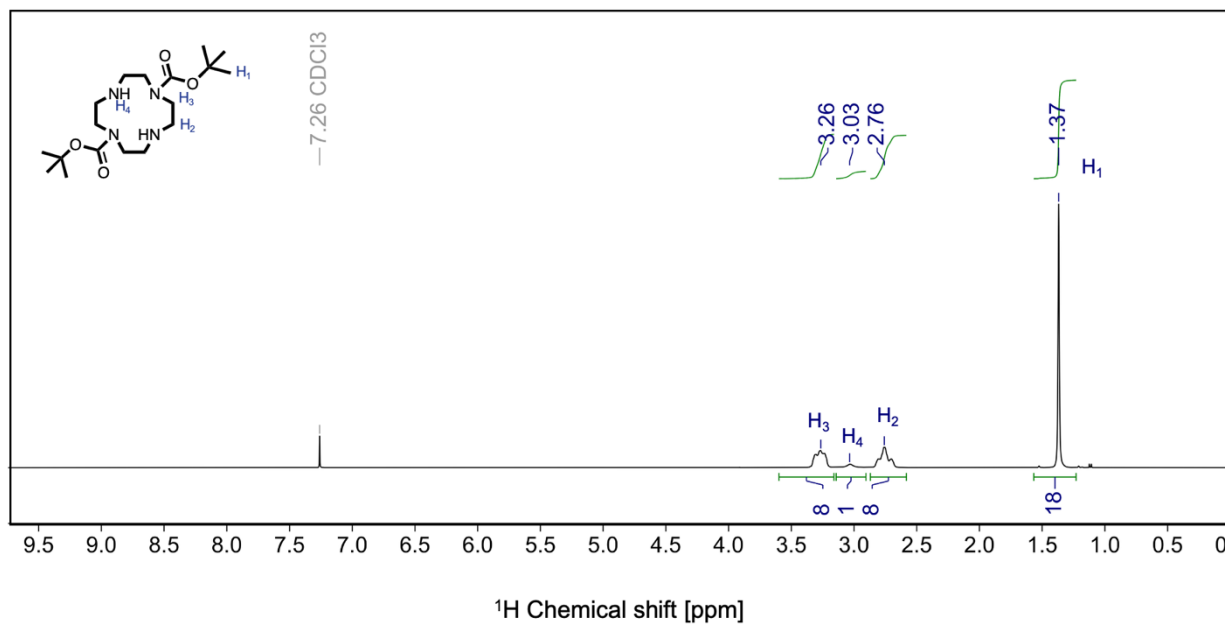

**Figure S2.** <sup>1</sup>H NMR spectrum of 1,7-bis(tert-butyloxycarbonyl)-1,4,7,10-tetraazacyclododecane - di-Boc-cyclen (400 MHz, CDCl<sub>3</sub>, *T* = 25°C) and signal attributions.

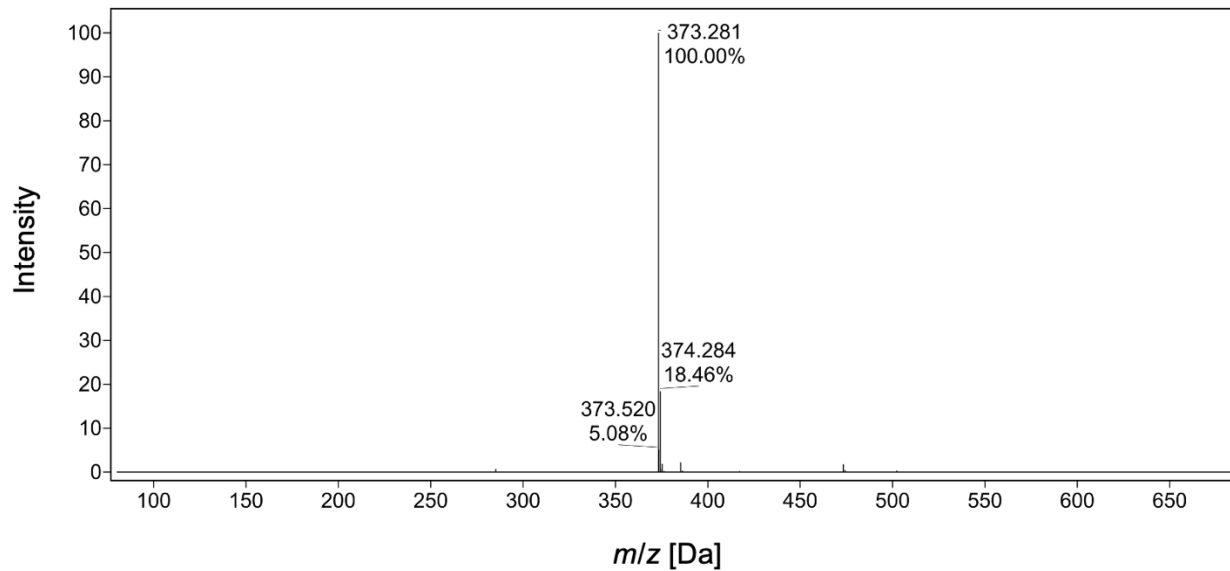

**Figure S3.** HR-MS spectrum of [di-Boc-cyclen-H]<sup>+</sup>.

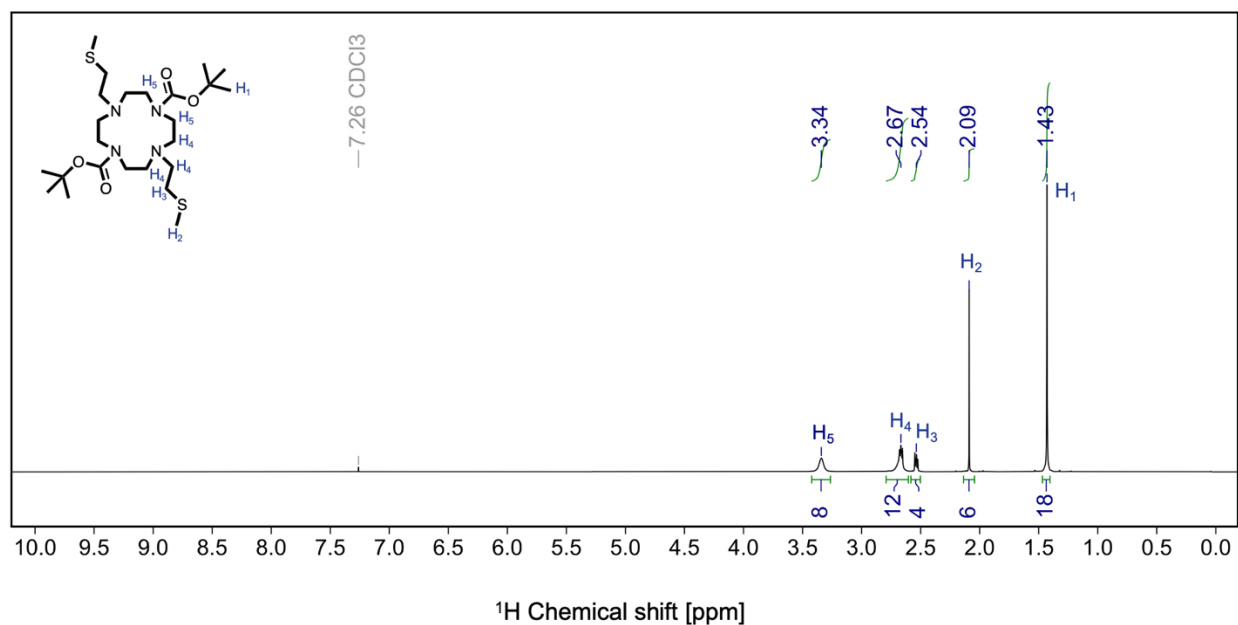

**Figure S4.** <sup>1</sup>H NMR spectrum of 1,7-bis(tert-butyloxycarbonyl)-4,10-bis(2-(methylsulfanyl)ethyl)-1,4,7,10-tetraazacyclododecane - di-Boc-DO<sub>2</sub>S (400 MHz, CDCl<sub>3</sub>, T = 25°C) and signal attributions.

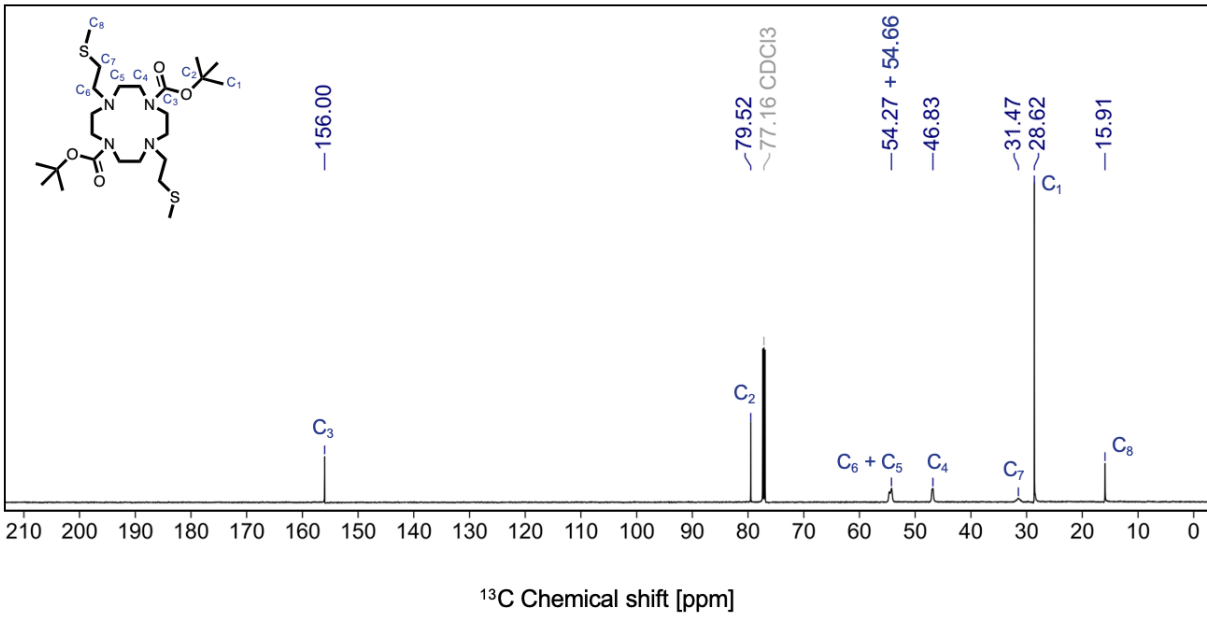

**Figure S5.**  $^{13}\text{C}\{^1\text{H}\}$  NMR spectrum of di-Boc-DO2S (400 MHz,  $\text{CDCl}_3$ ,  $T = 25^\circ\text{C}$ ) and signal attributions.

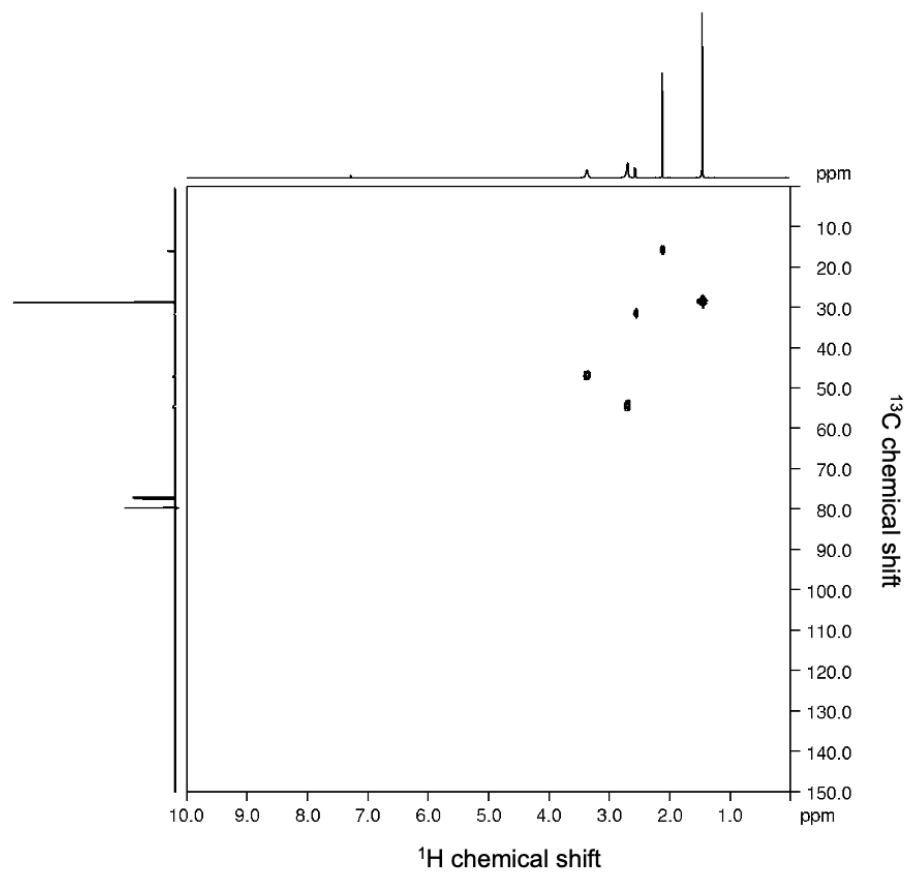

**Figure S6.**  $^1\text{H}$ - $^{13}\text{C}$  HSQC spectrum of di-Boc-DO2S (400 MHz,  $\text{CDCl}_3$ ,  $T = 25^\circ\text{C}$ ).

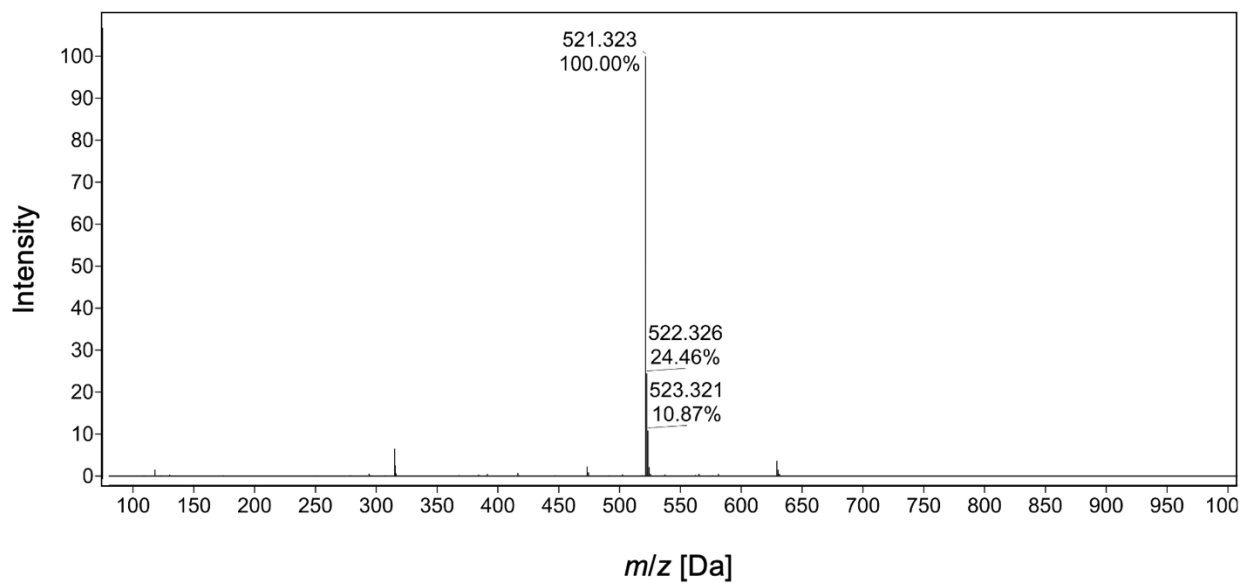

**Figure S7.** HR-MS spectrum of  $[\text{di-Boc-DO2S-H}]^+$ .

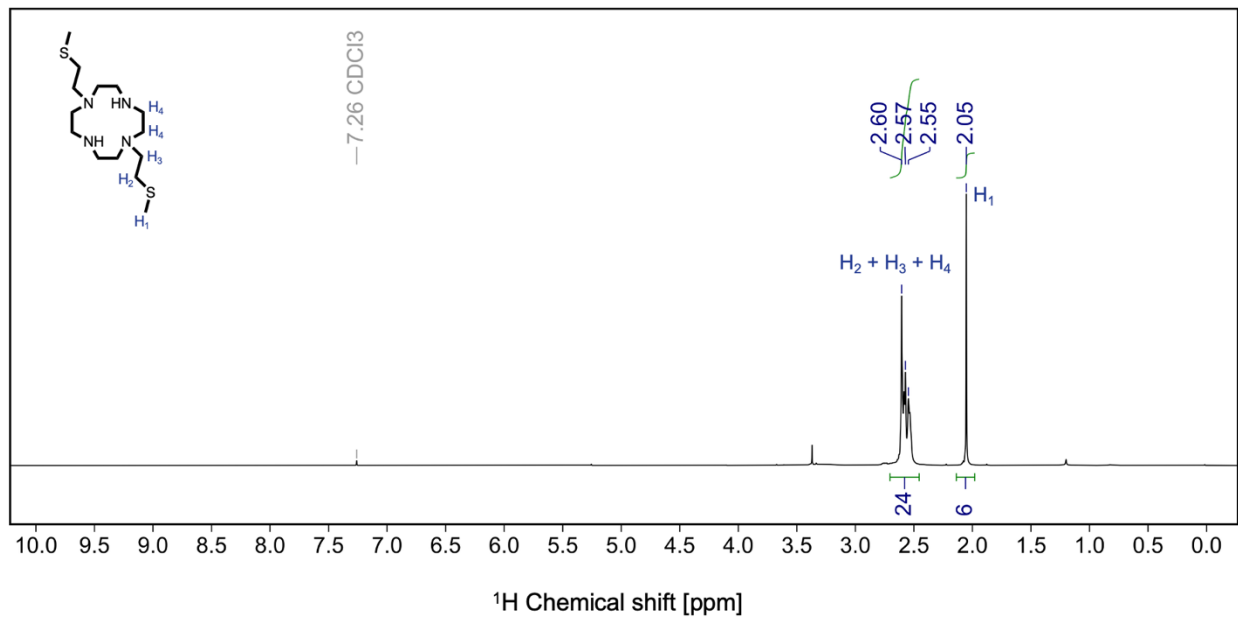

**Figure S8.**  $^1\text{H}$  NMR spectrum of 1,7-bis(2-(methylsulfanyl)ethyl)-1,4,7,10-tetraazacyclododecane - DO2S (400 MHz,  $\text{CDCl}_3$ ,  $T = 25^\circ\text{C}$ ) and signal attributions.

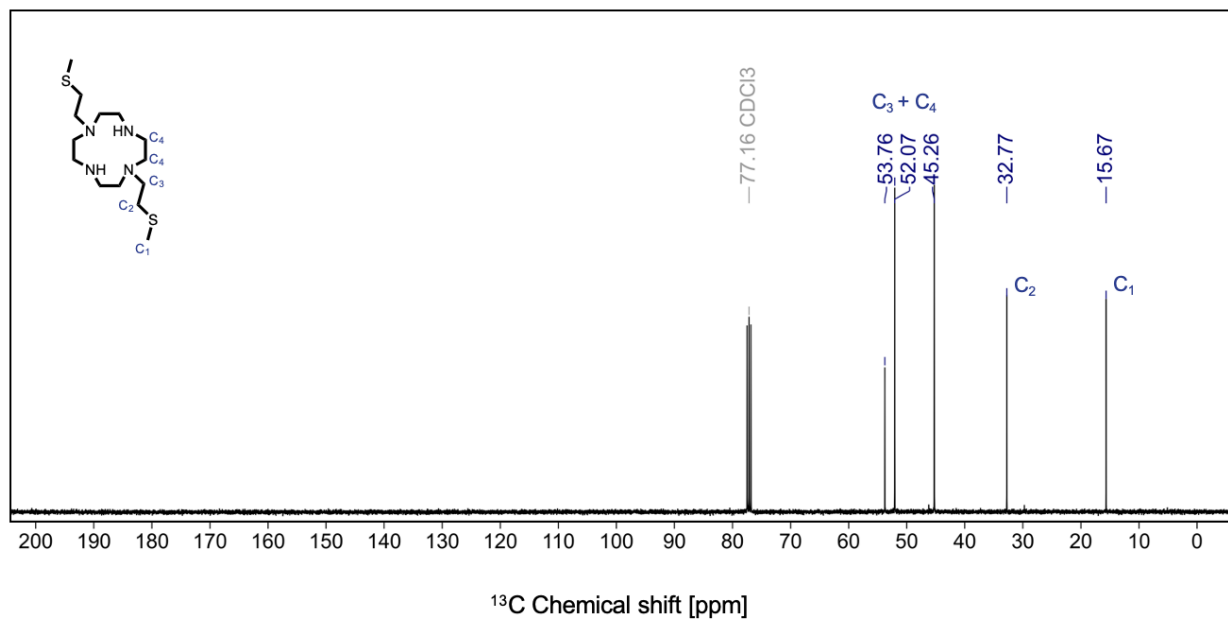

**Figure S9.**  $^{13}\text{C}\{^1\text{H}\}$  NMR spectrum of DO2S (400 MHz,  $\text{CDCl}_3$ ,  $T = 25^\circ\text{C}$ ) and signal attributions.

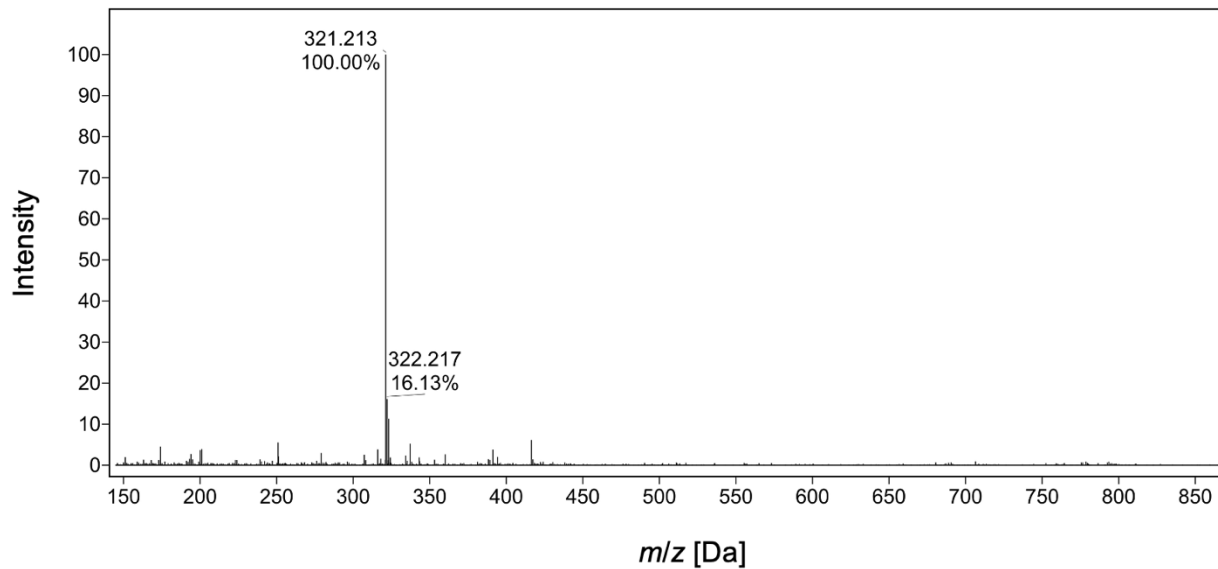

**Figure S10.** HR-MS spectrum of [DO2S-H]<sup>+</sup>.

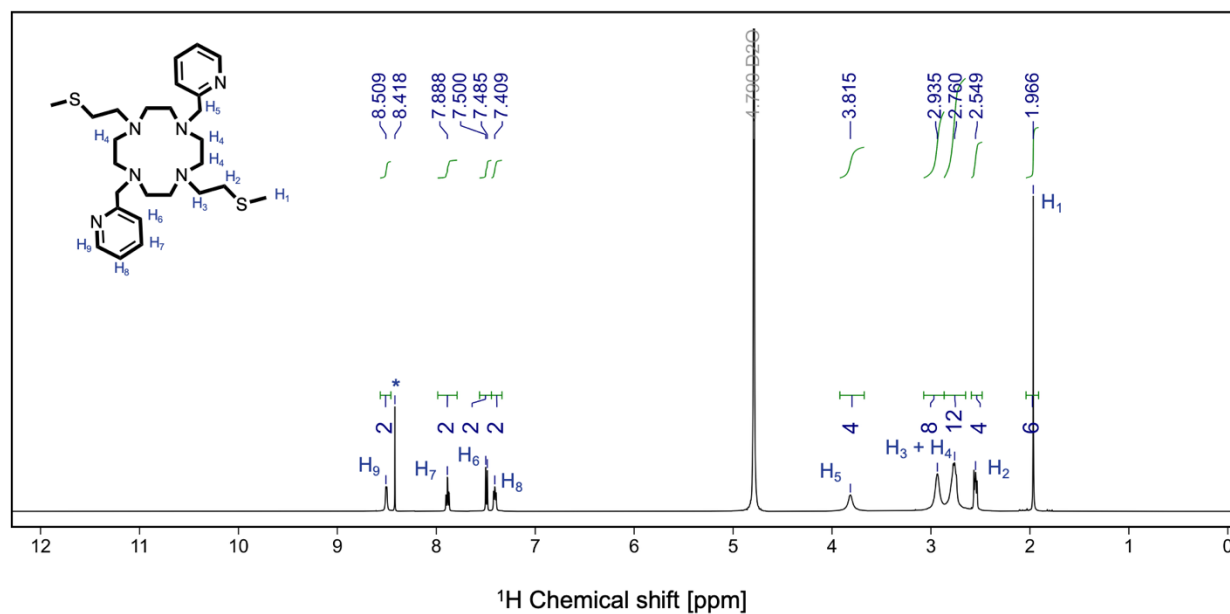

**Figure S11.** <sup>1</sup>H NMR spectrum of 1,7-bis(2-(methylsulfanyl)ethyl)-4,10-bis(pyridin-2-ylmethyl)-1,4,7,10-tetraazacyclododecane - DO2S2Py (400 MHz, D<sub>2</sub>O, T = 25°C) and signal attributions. The peak indicated with an asterisk is related to residual formic acid.

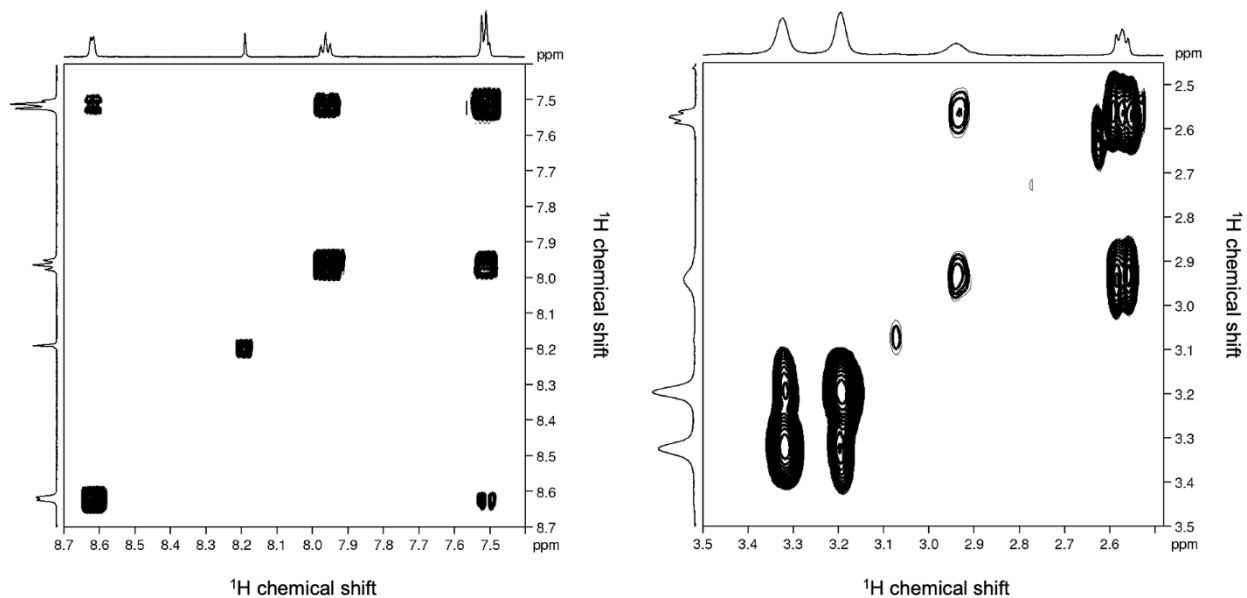

**Figure S12.**  $^1\text{H}$ - $^1\text{H}$  COSY spectrum of DO2S2Py (400 MHz,  $\text{D}_2\text{O}$ ,  $T = 25^\circ\text{C}$ ,  $\text{pD} \sim 3$ ).

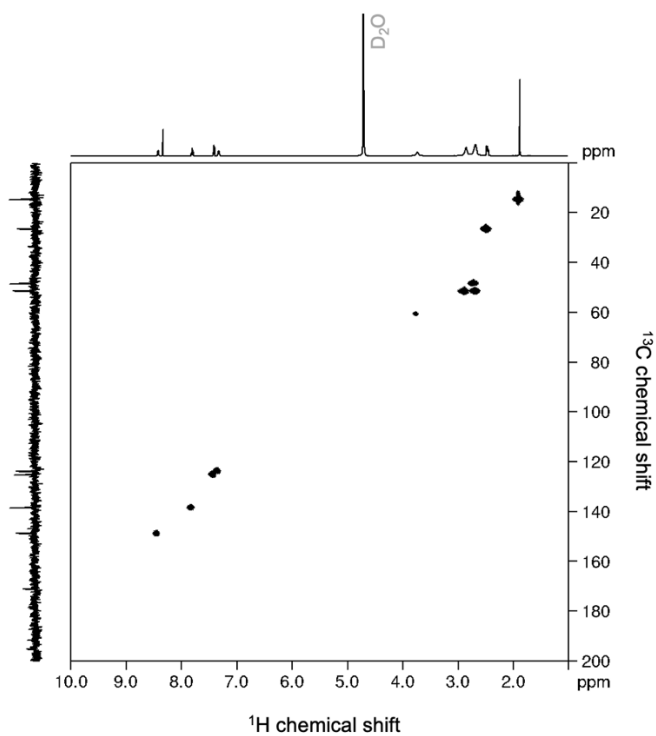

**Figure S13.**  $^1\text{H}$ - $^{13}\text{C}$  HSQC spectra of DO2S2Py (400 MHz,  $\text{D}_2\text{O}$ ,  $T = 25^\circ\text{C}$ ,  $\text{pD} \sim 9$ ).

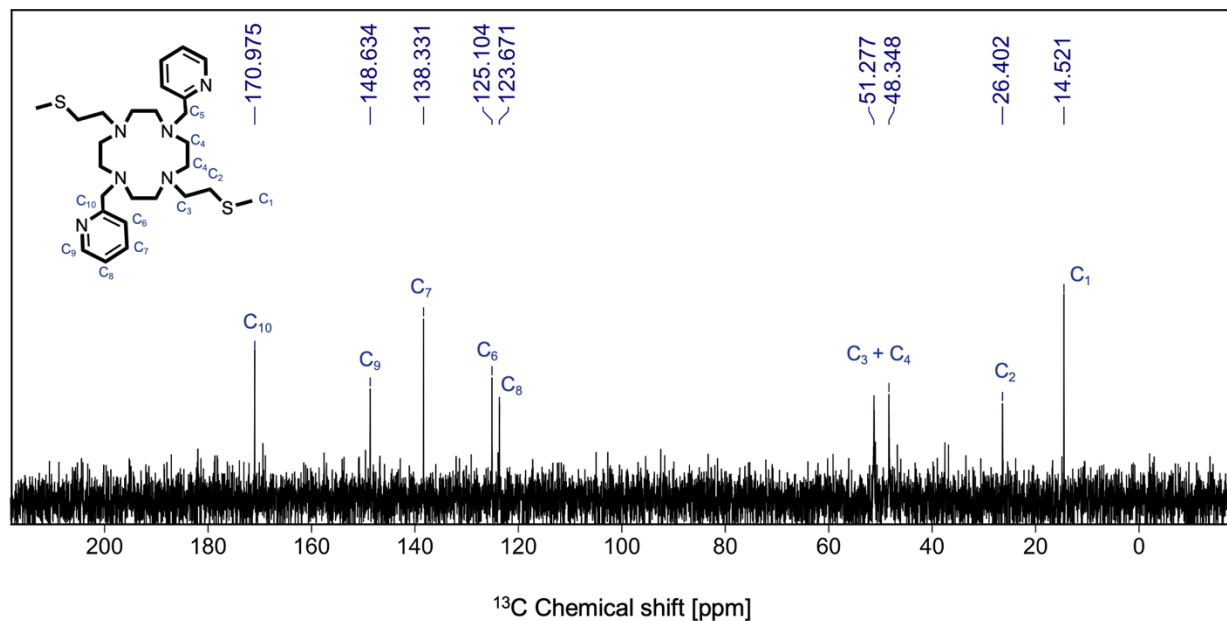

**Figure S14.**  $^{13}\text{C}\{^1\text{H}\}$  NMR spectrum of DO2S2Py (400 MHz,  $\text{D}_2\text{O}$ ,  $T = 25^\circ\text{C}$ ) and signal attributions.

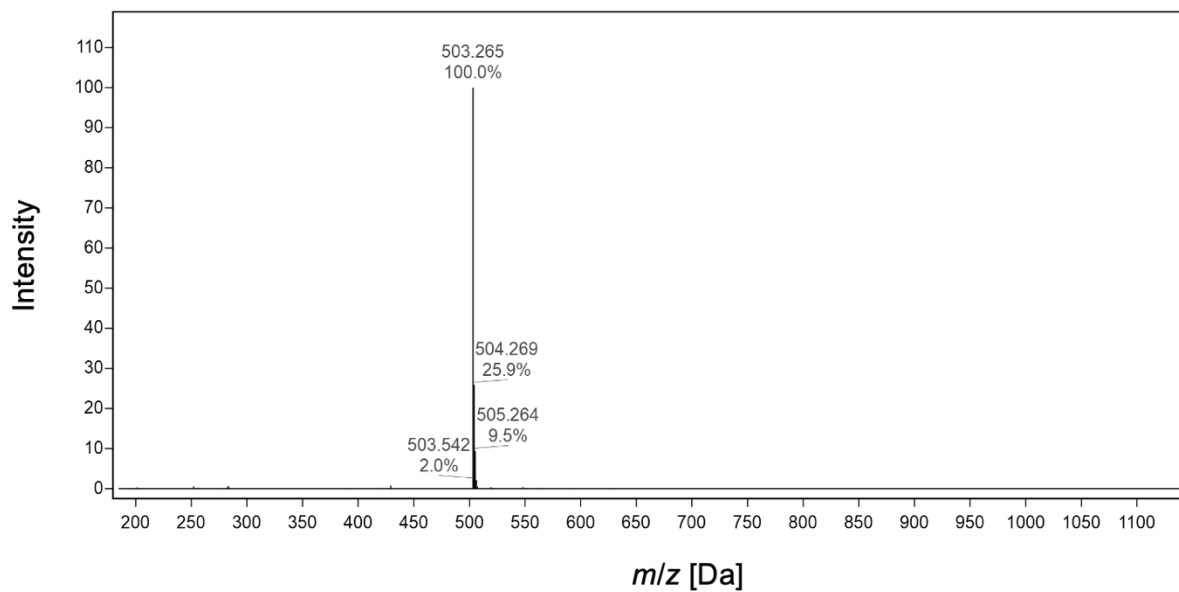

**Figure S15.** HR-MS spectrum of  $[\text{DO2S2Py-H}]^+$ .

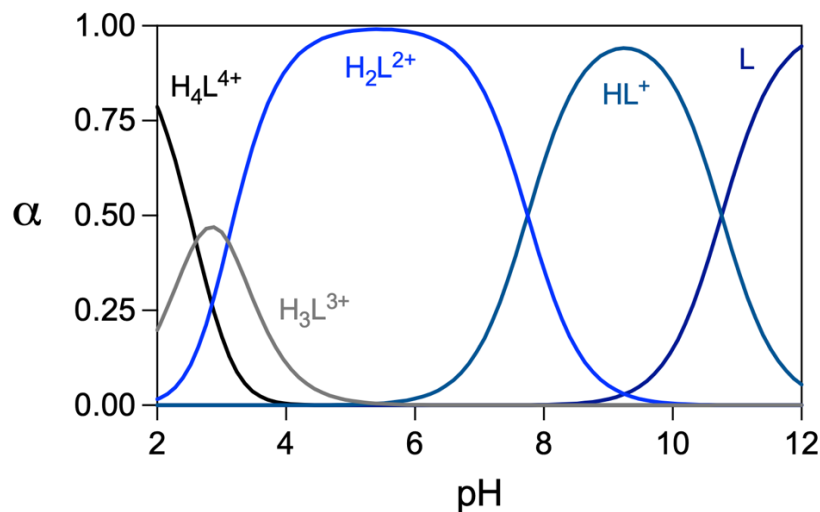

**Figure S16.** Distribution diagram of DO2S2Py, where  $\alpha$  represent the ratio between the concentration of a given protonation state and the total concentration of all species at equilibrium.

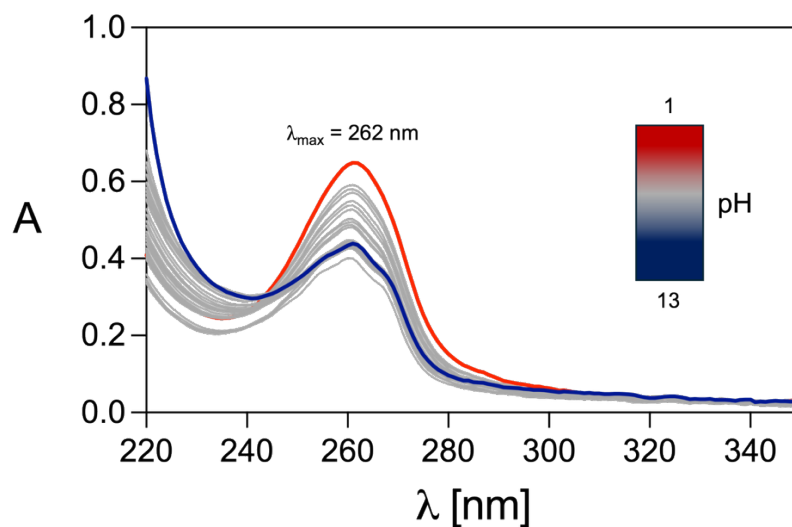

**Figure S17.** UV-Vis spectra of DO2S2Py at different pH values ( $T = 25^\circ\text{C}$ ,  $I = 0.1 \text{ M NaCl}$ ,  $C_{\text{DO2S2Py}} = 1 \cdot 10^{-4} \text{ M}$ ).

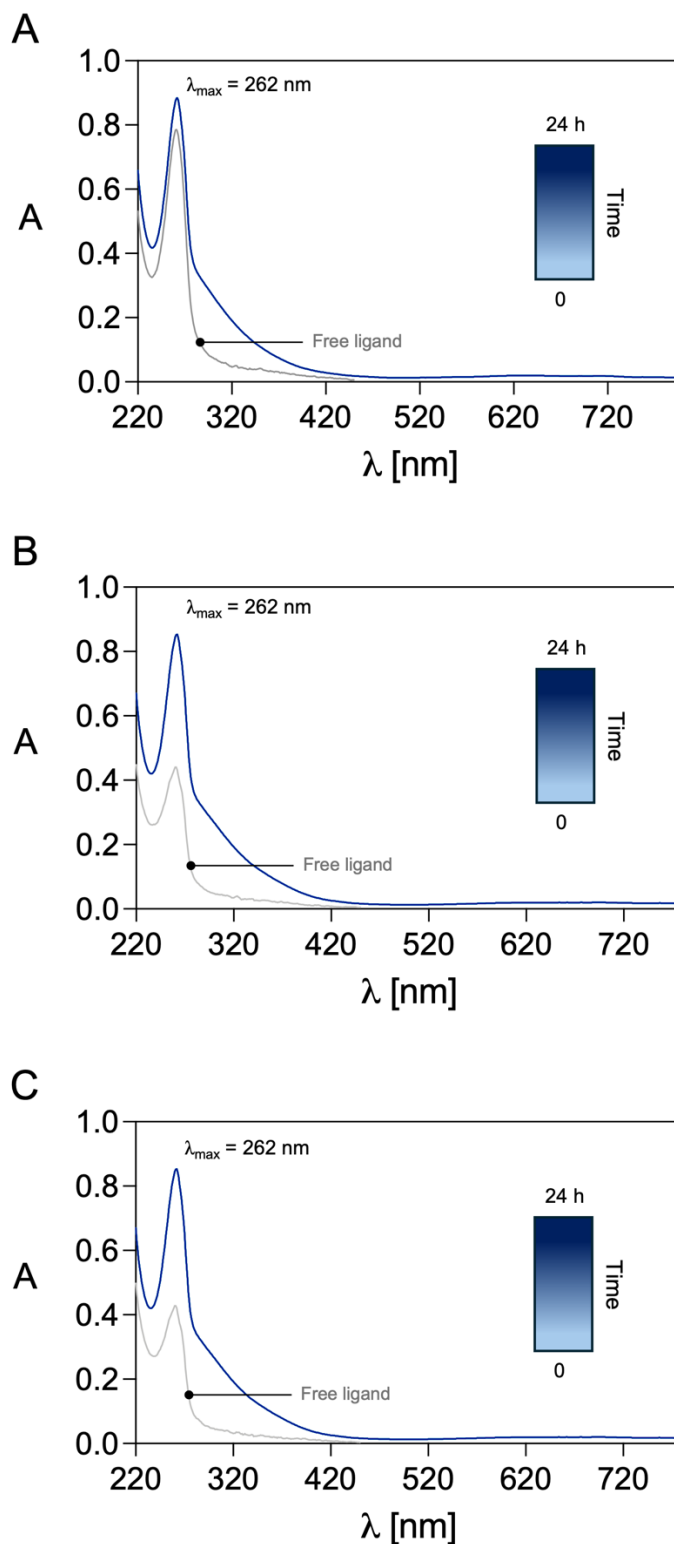

**Figure S18.** Representative time-dependent UV-Vis spectra of  $\text{Cu}^{2+}$ -DO2S2Py mixtures at pH (A) 2 (B) 4.5, and (C) pH 6.8 ( $T = 25^\circ\text{C}$ ,  $I = 0.15 \text{ M NaCl}$ ,  $C_{\text{DO2S2Py}} = C_{\text{Cu}} = 1 \cdot 10^{-4} \text{ M}$ ). No spectral variations were observed over time nor after extended heating.

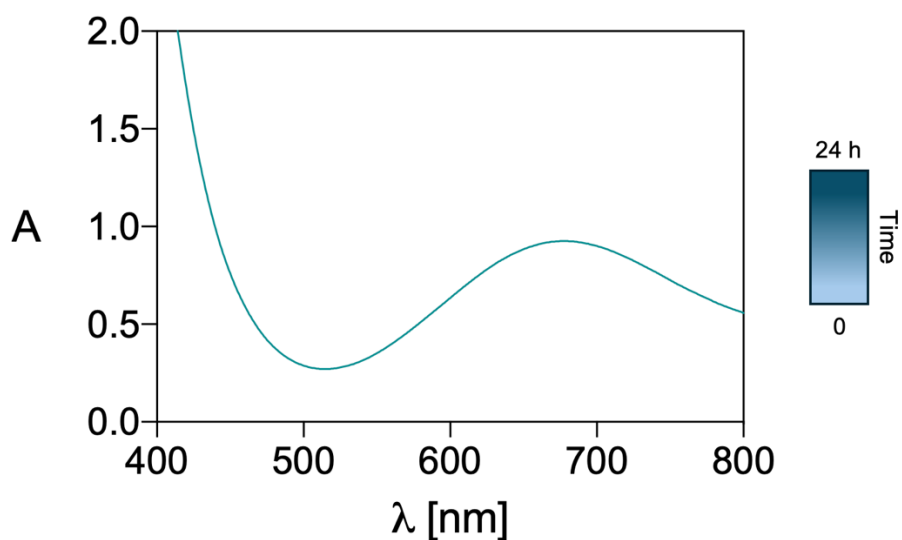

**Figure S19.** Representative time-dependent UV-Vis spectra of  $\text{Cu}^{2+}$ -DO2S2Py ( $T = 25^\circ\text{C}$ ,  $I = 0.15 \text{ M NaCl}$ ,  $C_{\text{DO2S2Py}} = C_{\text{Cu}} = 1 \cdot 10^{-3} \text{ M}$ , pH 4.5). No spectral variations were observed over time nor after extended heating. Free DO2S2Py shows no absorption in the reported spectral region.

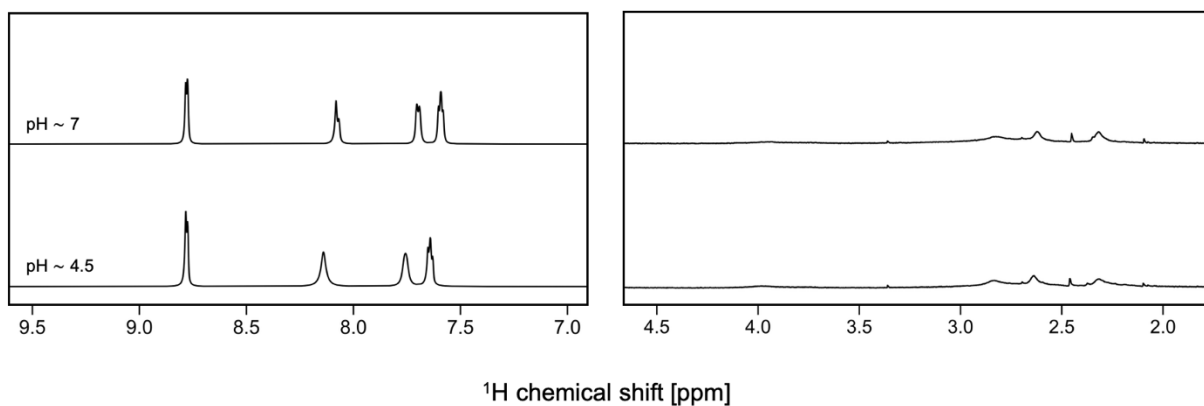

**Figure S20.** Representative  $^1\text{H}$  NMR spectra of  $\text{Ag}^{+}$ -DO2S2Py mixtures at different pH (400 MHz,  $\text{D}_2\text{O}$ ,  $T = 25^\circ\text{C}$ ,  $I = 0.15 \text{ M NaNO}_3$ ,  $C_{\text{DO2S2Py}} = C_{\text{Ag}} = 1 \cdot 10^{-3} \text{ M}$ ). No spectral variations were observed over time nor after extended heating. The spectra of the free ligands are reported in **Figure 2**.

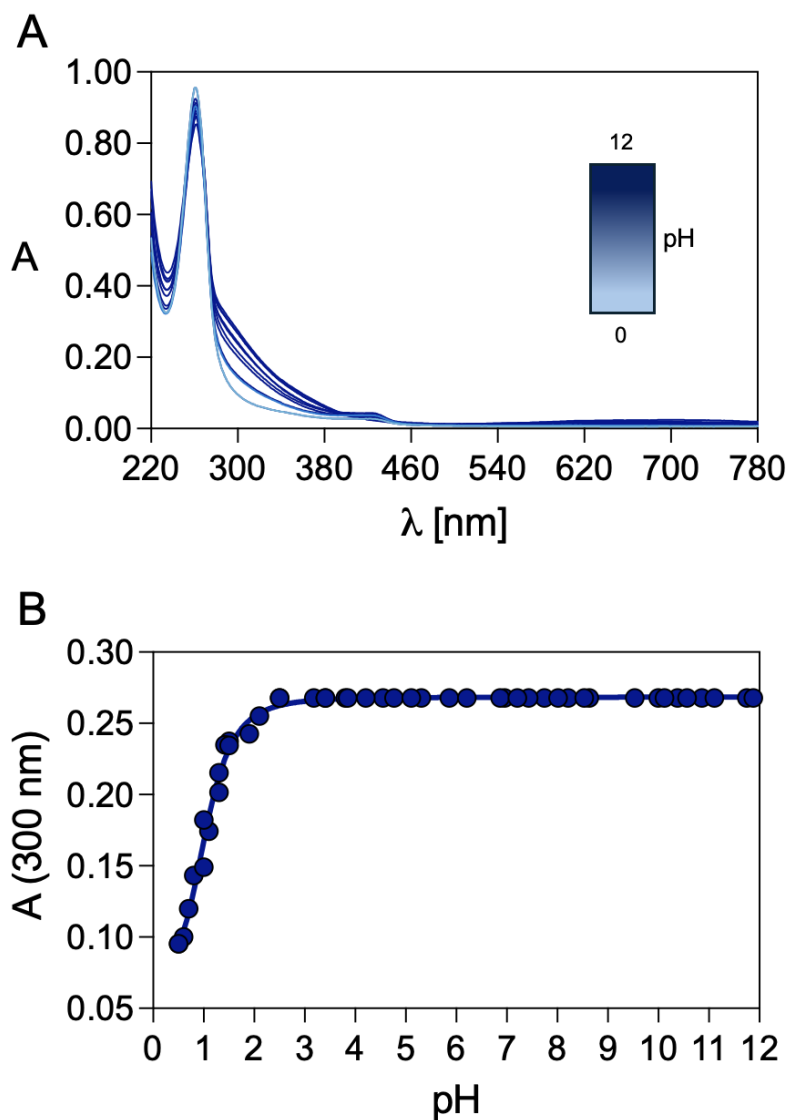

**Figure S21.** Representative (A) pH-dependent UV-Vis spectra of Cu<sup>2+</sup>-DO<sub>2</sub>S<sub>2</sub>Py ( $T = 25^{\circ}\text{C}$ ,  $I = 0.15 \text{ M NaCl}$ ,  $C_{\text{DO}_2\text{S}_2\text{Py}} = C_{\text{Cu}} = 1 \cdot 10^{-4} \text{ M}$ ) and (B) variation of absorbance at 300 nm as a function of pH.

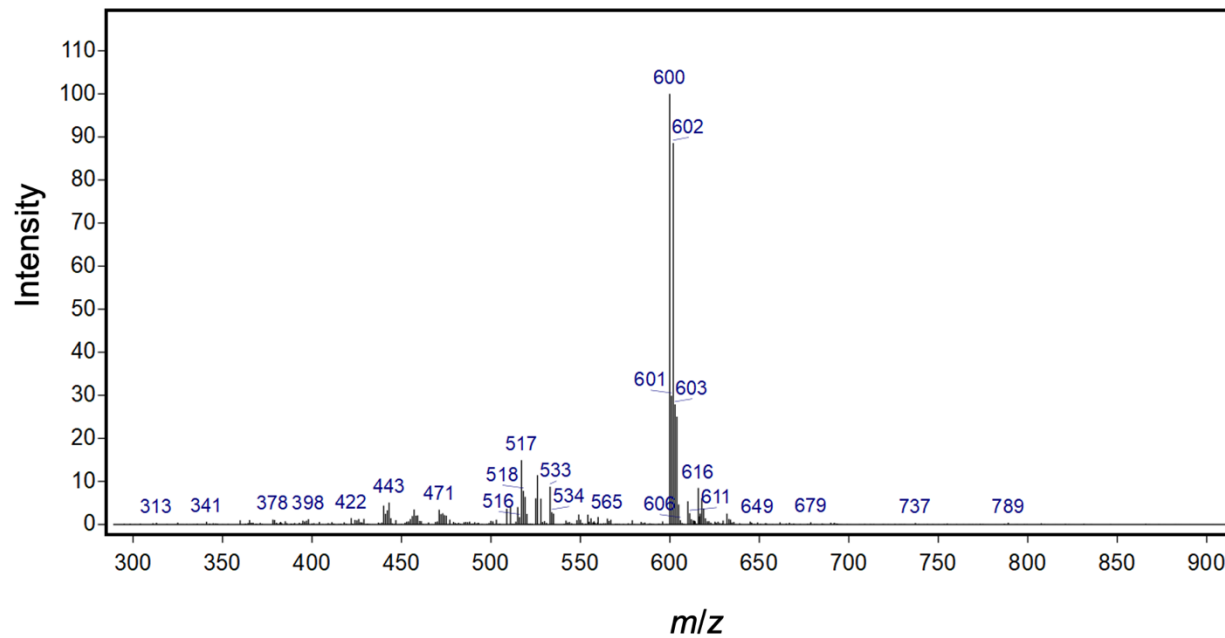

**Figure S22.** ESI-MS spectra of  $\text{Cu}^{2+}$ -DO2S2Py. The peak at  $m/z$  600 corresponds to  $[\text{Cu}(\text{DO2S2Py})(\text{Cl})]^+$  (calc.  $m/z$  600.19 for  $[\text{C}_{26}\text{H}_{42}\text{ClCuN}_6\text{S}_2]^+$ ).

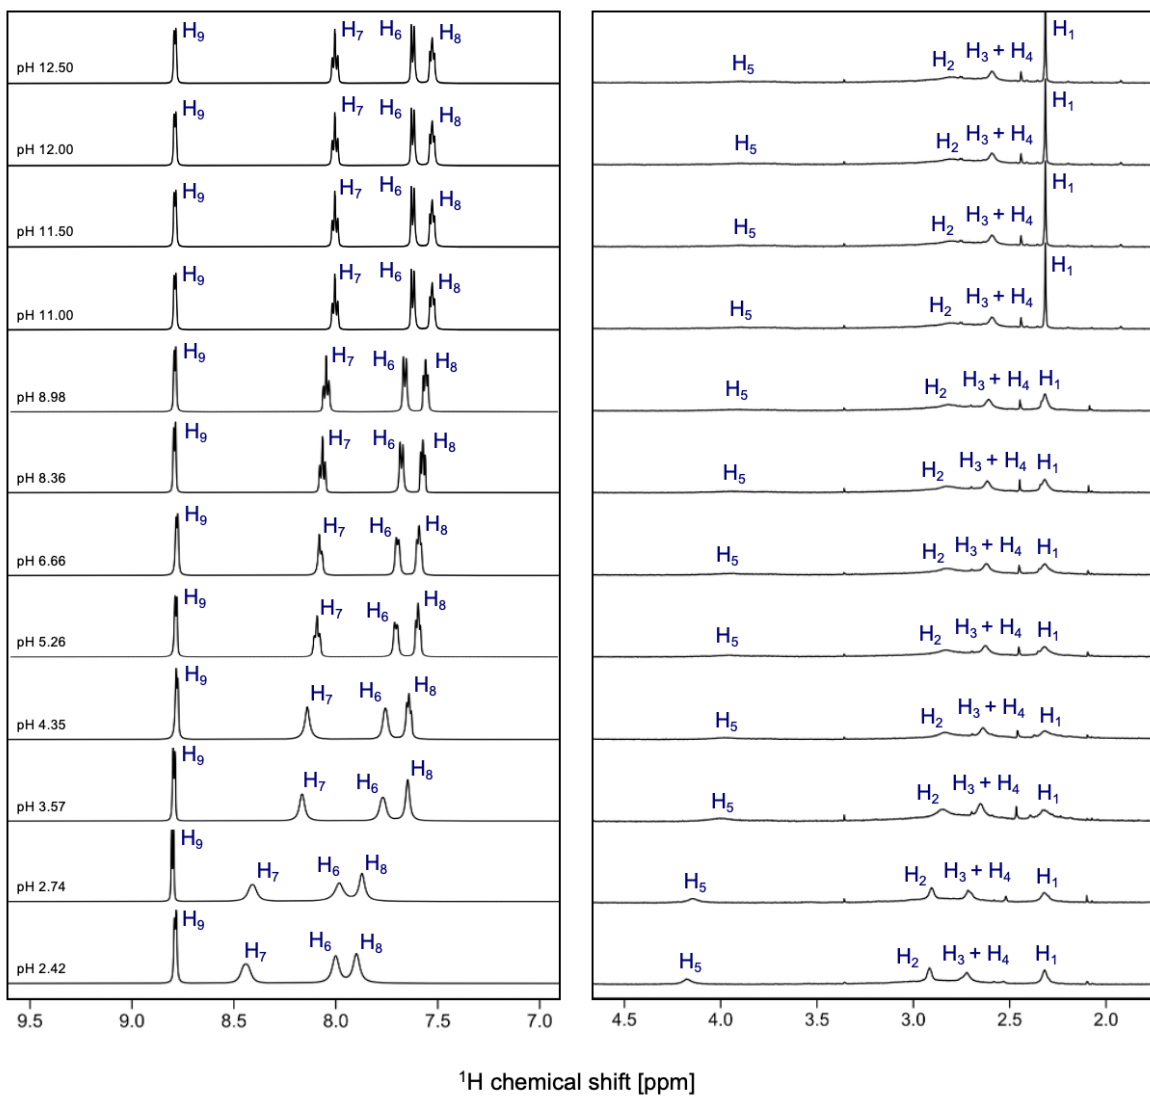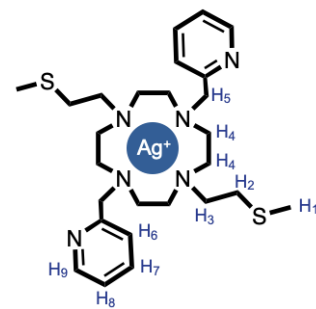

**Figure S23.** Representative  $^1\text{H}$  NMR spectra of  $\text{Ag}^+$ -DO2S2Py at different pH (400 MHz,  $\text{D}_2\text{O}$ ,  $T = 25^\circ\text{C}$ ,  $I = 0.15 \text{ M NaNO}_3$ ,  $C_{\text{DO2S2Py}} = C_{\text{Ag}} = 1 \cdot 10^{-3} \text{ M}$ ) and signal attributions. Aromatic and aliphatic intensity scales are different.

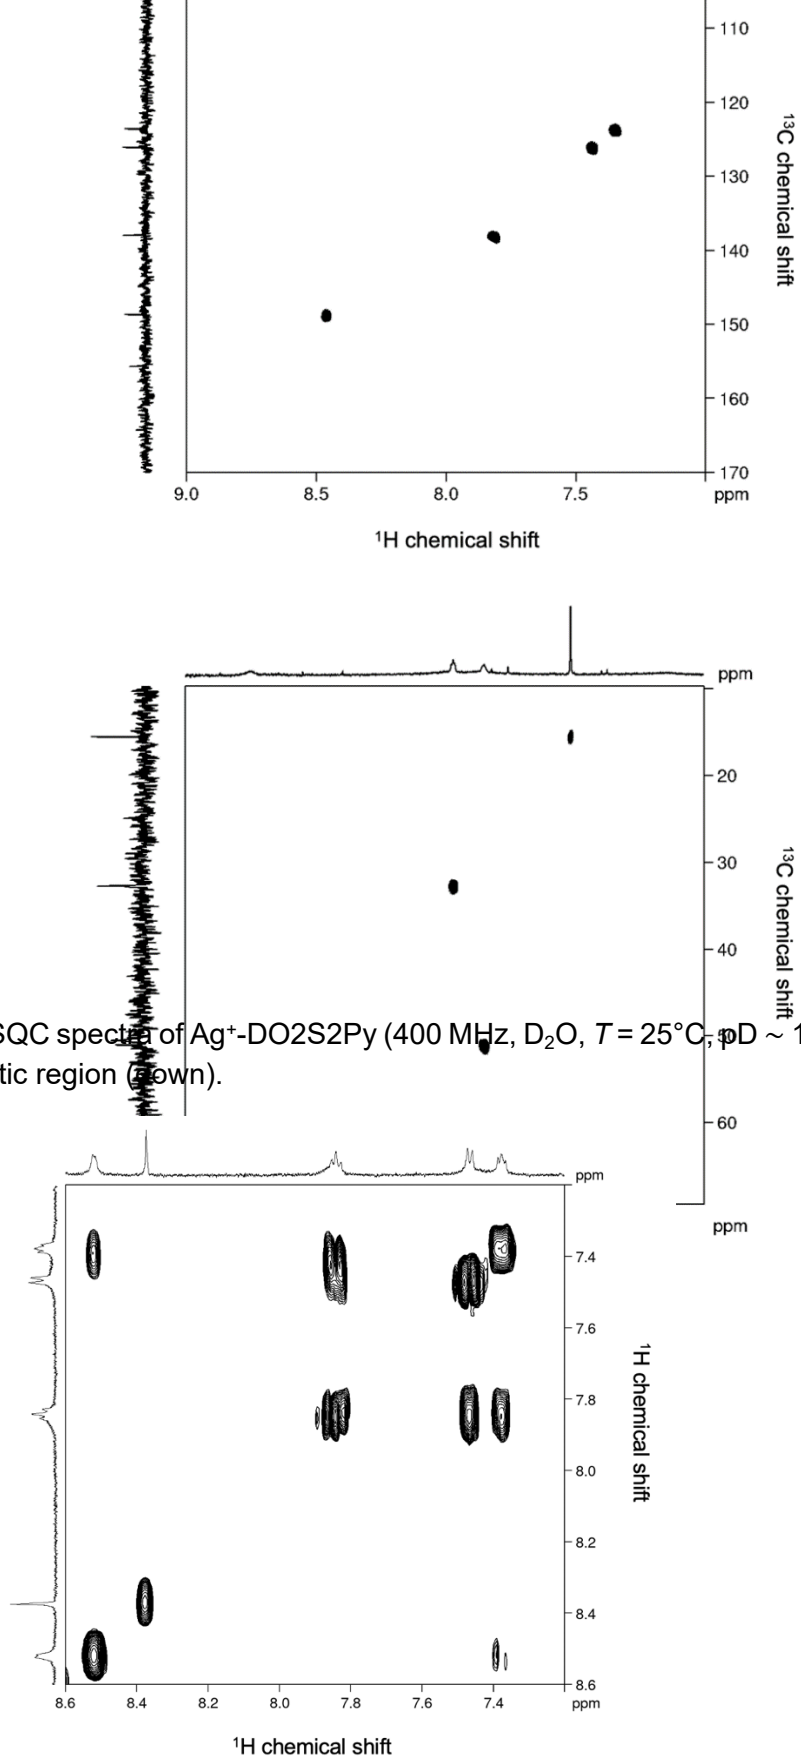

**Figure S24.**  $^1\text{H}$ - $^{13}\text{C}$  HSQC spectra of  $\text{Ag}^+$ -DO2S2Py (400 MHz,  $\text{D}_2\text{O}$ ,  $T = 25^\circ\text{C}$ ,  $\text{pD} \sim 11$ ): aromatic region (up) and aliphatic region (down).

**Figure S25.**  $^1\text{H}$ - $^1\text{H}$  COSY spectra (aromatic region) of  $\text{Ag}^+$ -DO2S2Py (400 MHz,  $\text{D}_2\text{O}$ ,  $T = 25^\circ\text{C}$ ,  $\text{pD} \sim 11$ ).

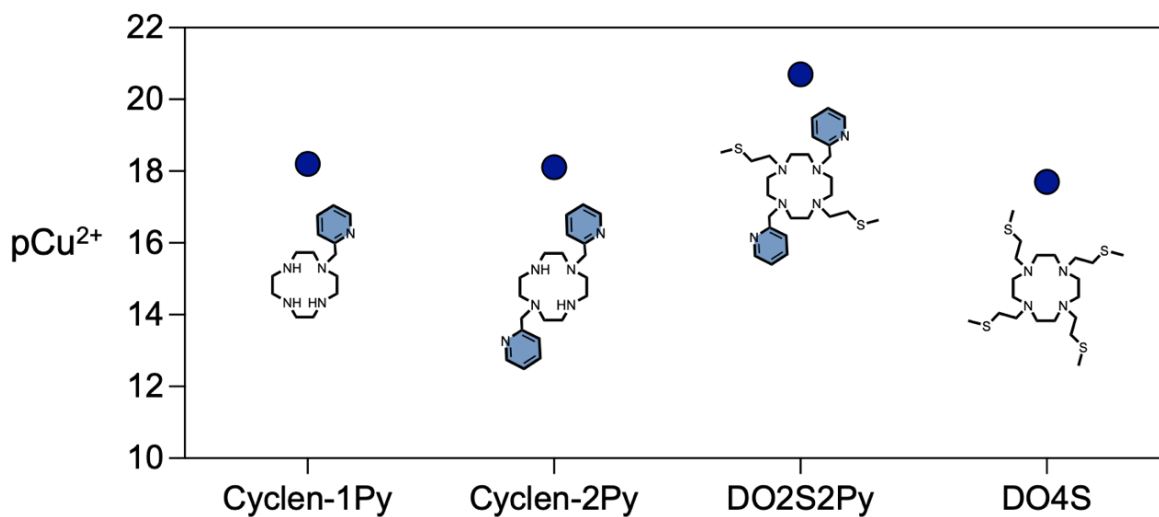

**Figure S26.** Comparison of  $\text{pCu}^{2+}$  values between DO2S2Py, DO4S and other py-containing chelators.  $\text{pCu}^{2+}$  were calculated at  $\text{pH} 7.4$ ,  $C_{\text{DO2S2Py}} = 1 \cdot 10^{-5} \text{ M}$  and  $C_{\text{Cu}} = 1 \cdot 10^{-6} \text{ M}$ .

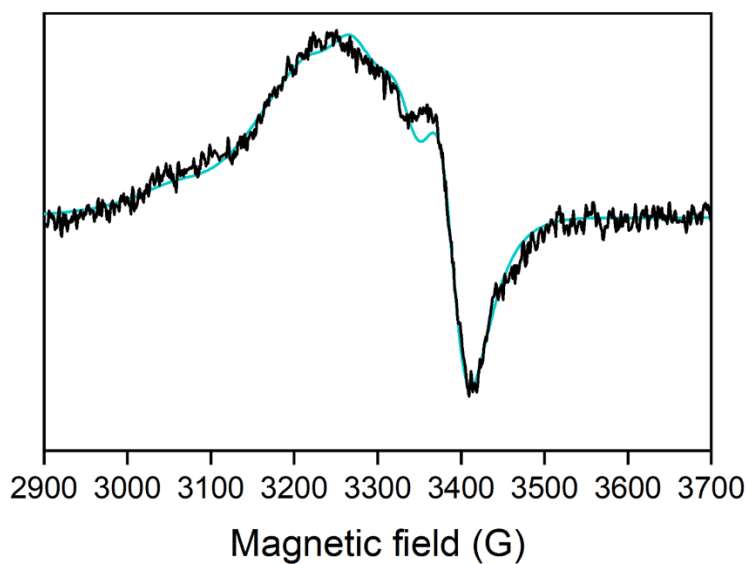

**Figure S27.** Measured (**black**) and simulated (**light blue**) room temperature EPR spectra of  $[\text{Cu}(\text{DO2S2Py})]^{2+}$ . For the simulation, anisotropic EPR parameters were considered with a rotation correlation time of  $4.2 \cdot 10^{-10}$  s.

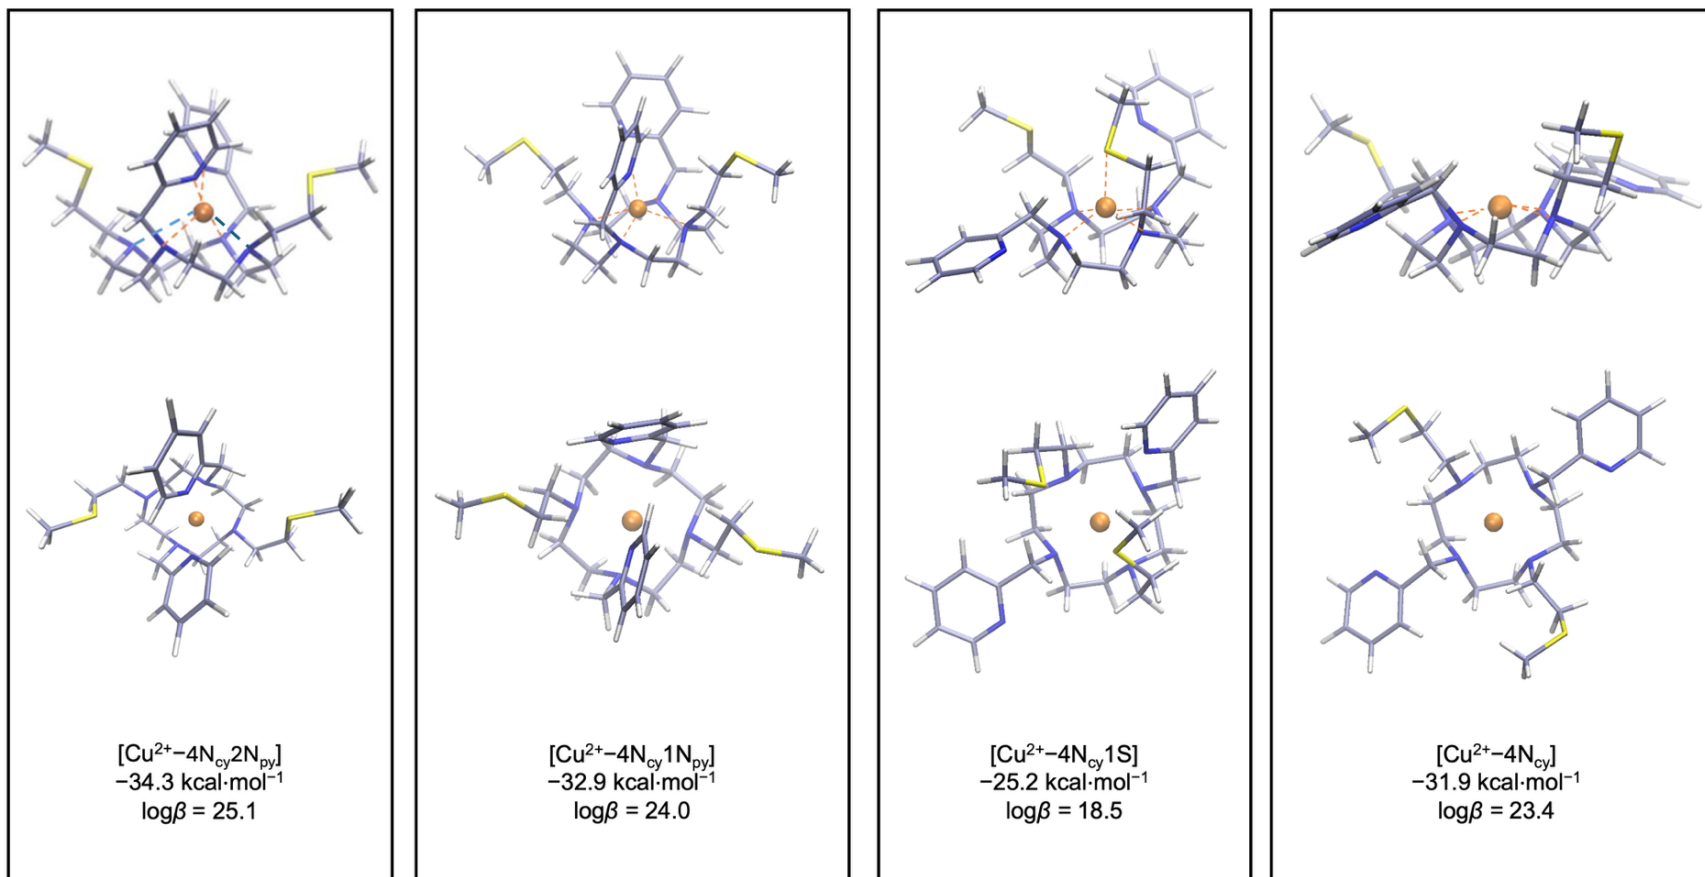

**Figure S28.** B3PW91 optimized geometrical structures of  $[\text{Cu}(\text{DO2S2Py})]^{2+}$  calculated in water together with the relative binding energies (kcal·mol<sup>-1</sup>) and corresponding  $\log\beta$  values. Structures are displayed from multiple perspectives.

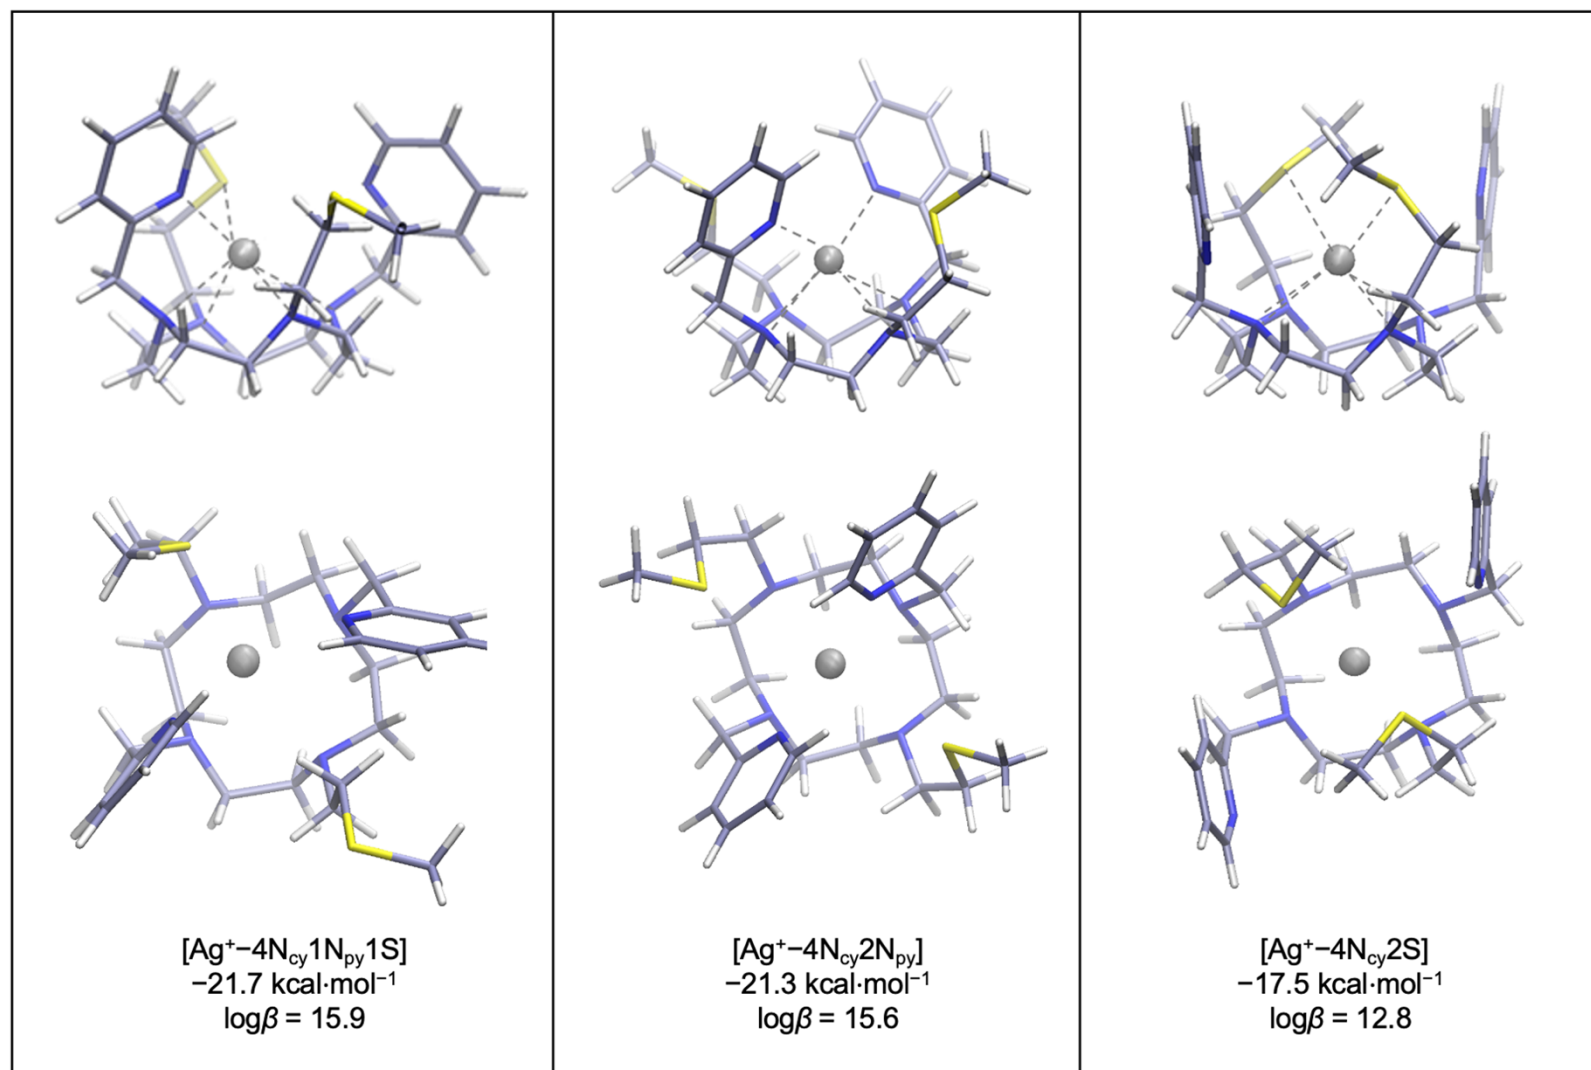

**Figure S29.** B3PW91 optimized geometrical structures of  $[\text{Ag}(\text{DO2S2Py})]^+$  calculated in water together with the relative binding energies ( $\text{kcal}\cdot\text{mol}^{-1}$ ) and corresponding  $\log\beta$  values. Structures are displayed from multiple perspectives.

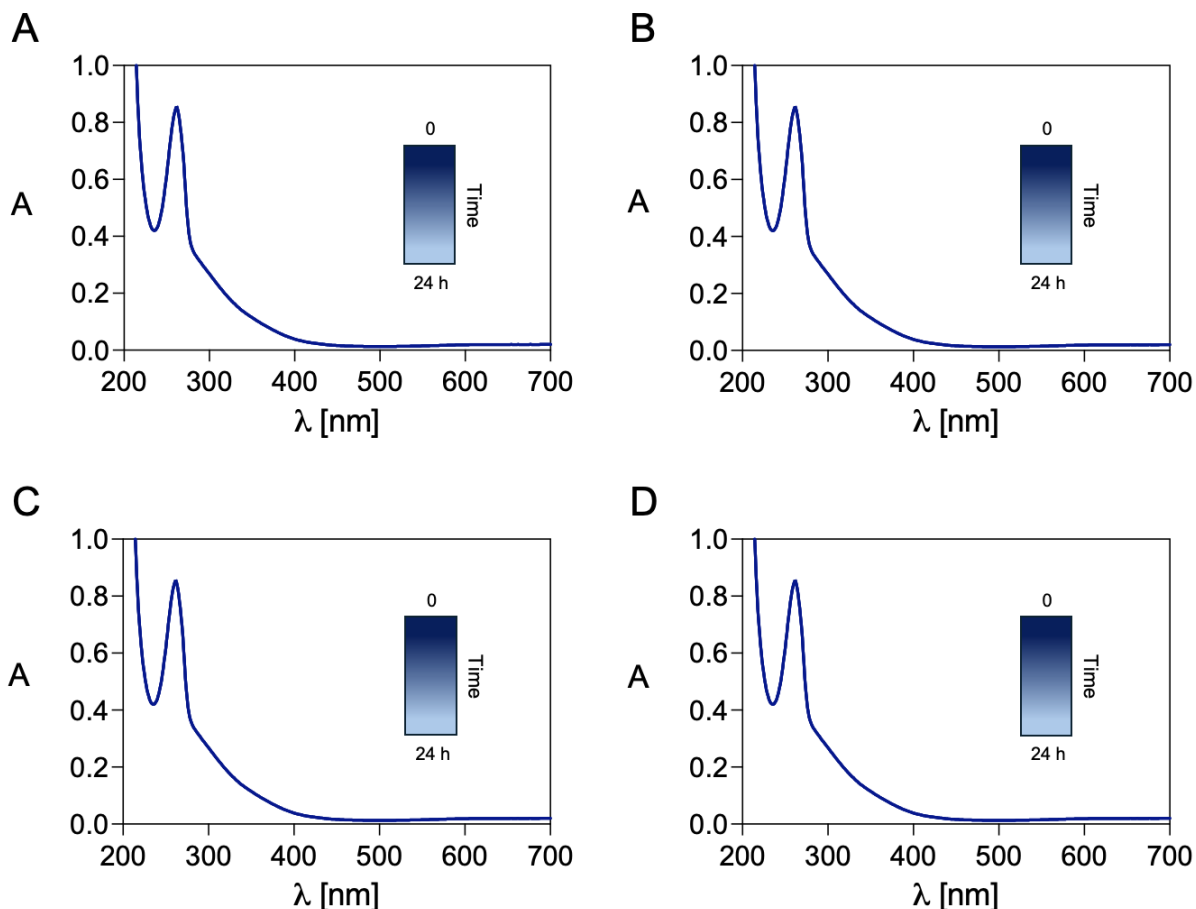

**Figure S30.** Representative time-dependent UV-Vis spectra of  $[\text{Cu}(\text{DO2S2Py})]^{2+}$  ( $T = 25^\circ\text{C}$ ,  $C_{\text{DO2S2Py}} = C_{\text{Cu}} = 1 \cdot 10^{-4} \text{ M}$ ) in the presence of (A)  $\text{Zn}^{2+}$ , (B)  $\text{Mg}^{2+}$ , (C)  $\text{Ca}^{2+}$  ( $C_{\text{competitor}} = 1 \cdot 10^{-3} \text{ M}$ ,  $n_{\text{competitor}}/n_{\text{complex}} = 10$ ) and (D) PBS (1:1 V/V dilution).

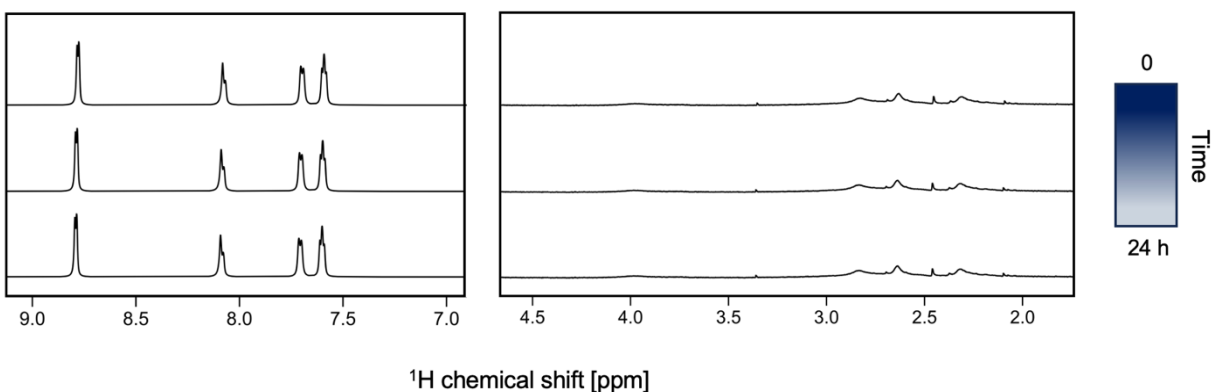

**Figure S31.** Representative time-dependent  $^1\text{H}$  NMR spectra of  $[\text{Ag}(\text{DO2S2Py})]^+$  (400 MHz,  $T = 25^\circ\text{C}$ ,  $C_{\text{DO2S2Py}} = C_{\text{Ag}} = 1 \cdot 10^{-3} \text{ M}$ ) in the presence of  $\text{Zn}^{2+}$  ( $n_{\text{Zn}}/n_{\text{complex}} = 10$ ). Identical spectra were obtained upon addition of  $\text{Mg}^{2+}$ ,  $\text{Ca}^{2+}$  ( $n_{\text{competitor}}/n_{\text{complex}} = 10$ ) or PBS (1:1 V/V dilution), and therefore only representative data are shown.

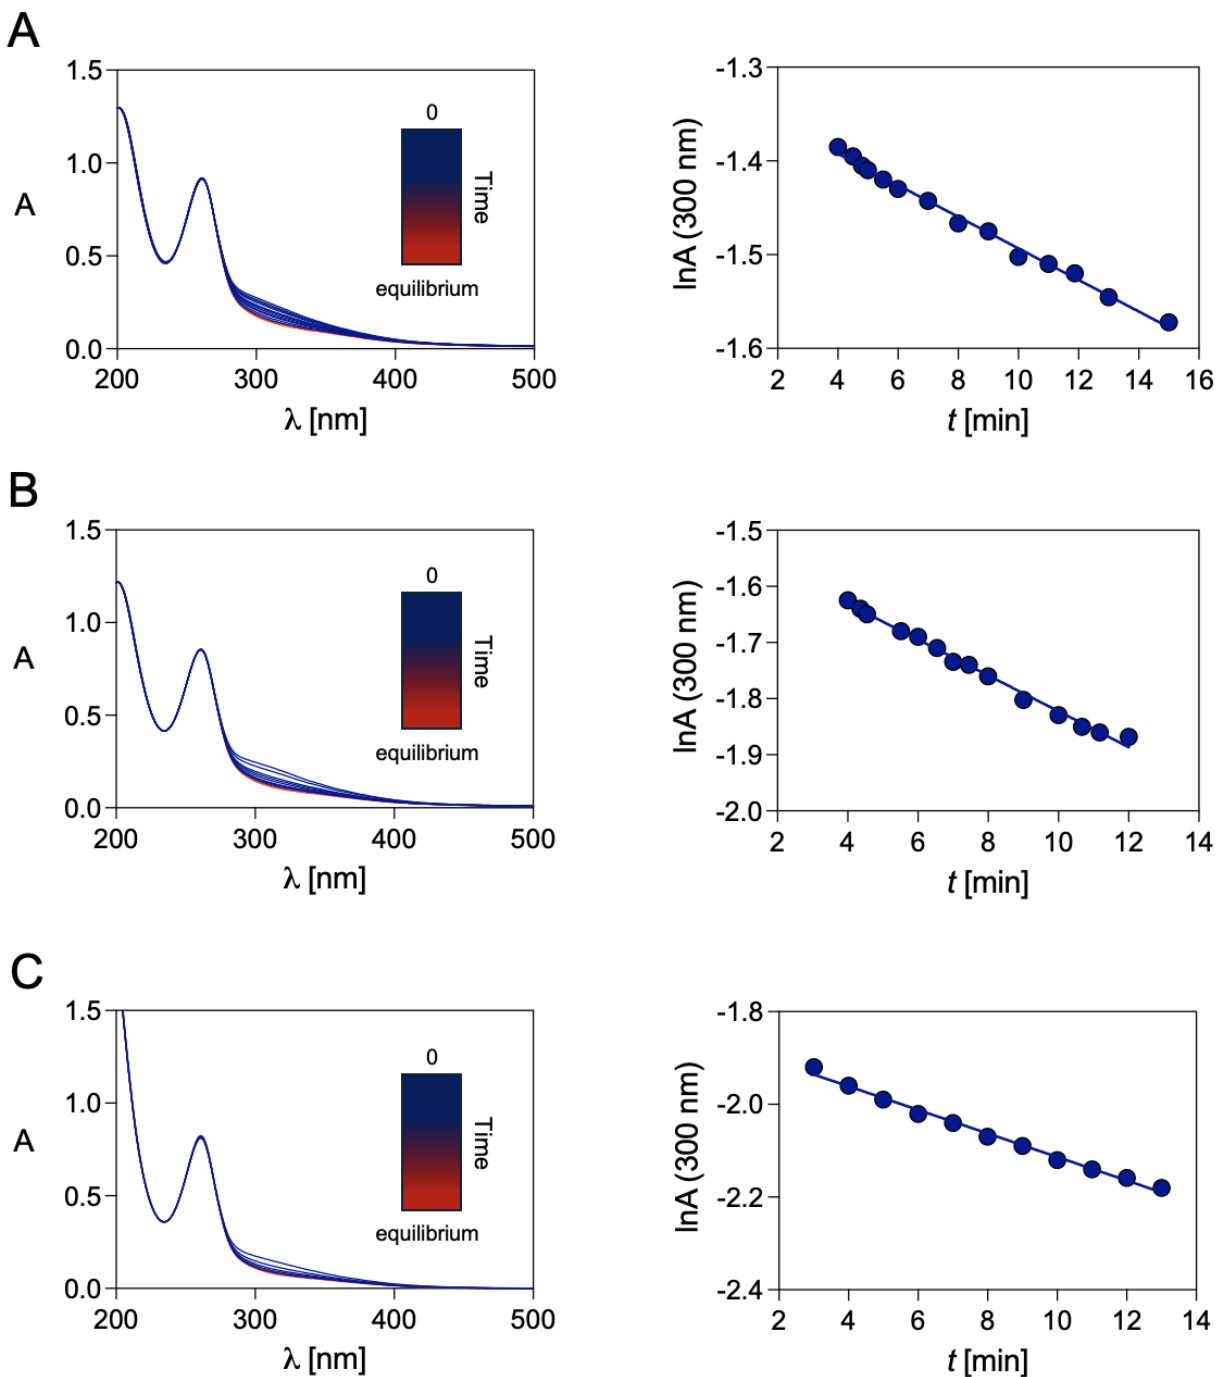

**Figure S32.** Left: UV-Vis spectra variation during the acid-assisted decomplexation assays for  $[\text{Cu}(\text{DO}_2\text{S}_2\text{Py})]^{2+}$  ( $C_{\text{Cu}} = C_{\text{DO}_2\text{S}_2\text{Py}} = 1.0 \cdot 10^{-4}$  M) in (A) 0.4 M, (B) 0.6 M, (C) 0.8 M HCl solutions. Right: plot of  $\ln A$  vs.  $t$  and the corresponding fitting line.

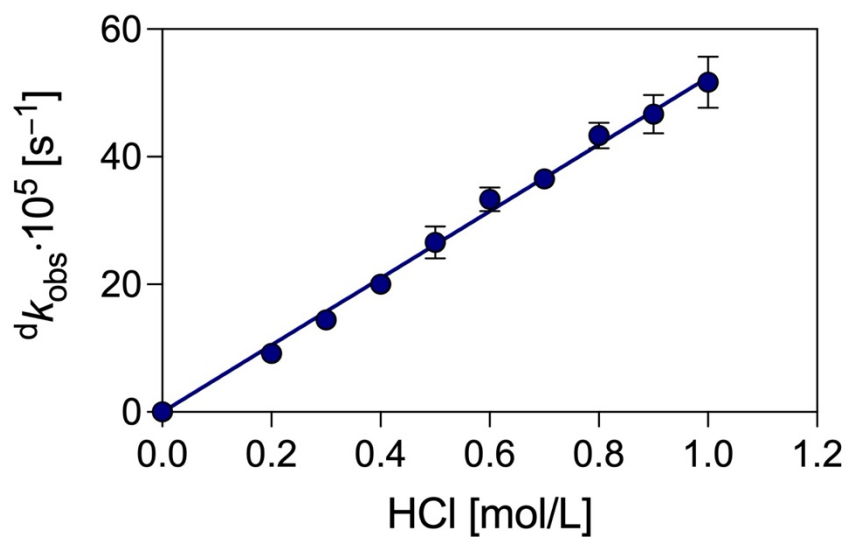

**Figure S33.** pH-Dependence of  ${}^d k_{\text{obs}}$  for acid-mediated decomplexation of  $[\text{Cu}(\text{DO2S2Py})]^{2+}$  and the corresponding fitting line obtained with the equation  ${}^d k_{\text{obs}} = {}^d k[\text{H}^+]$ .

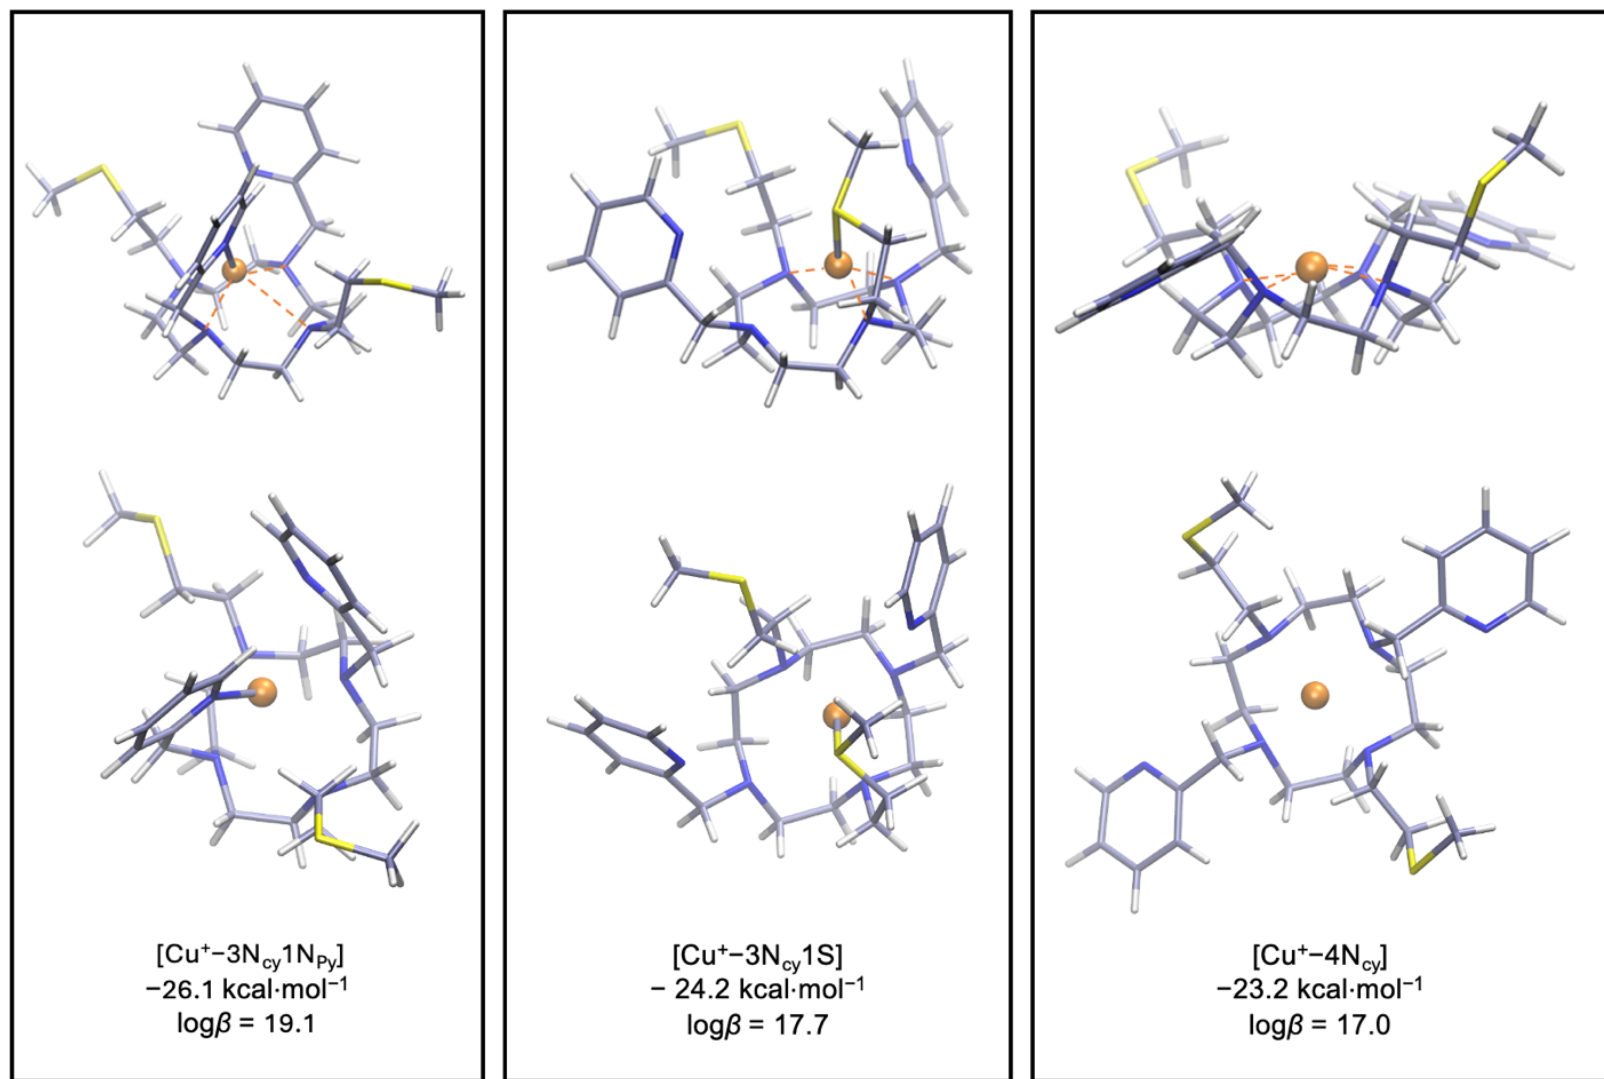

**Figure S34.** B3PW91 optimized geometrical structures of [Cu(DO2S2Py)]<sup>+</sup> calculated in water together with the relative binding energies (kcal·mol<sup>-1</sup>) and corresponding logβ values. Structures are displayed from multiple perspectives.

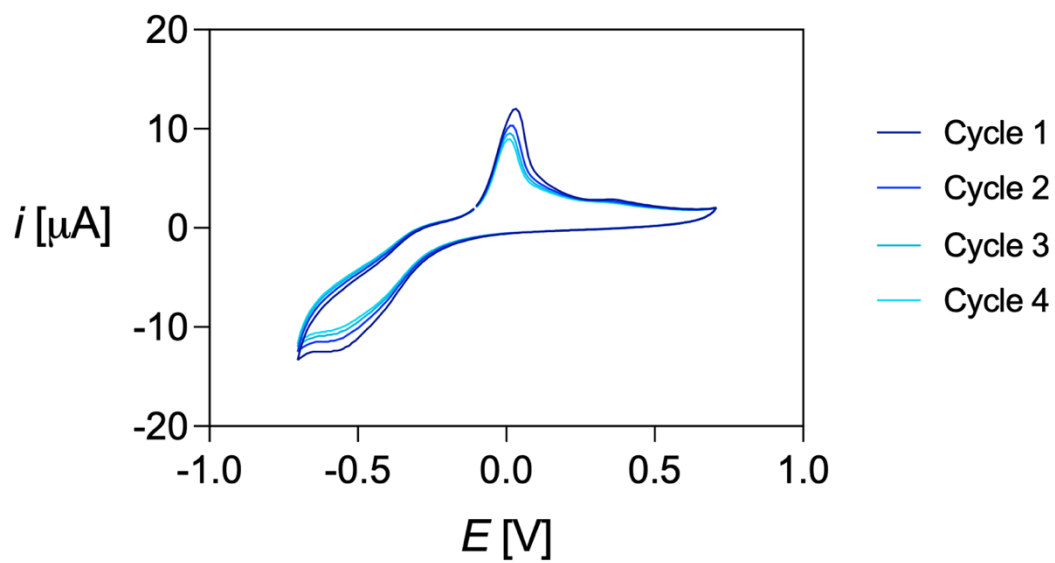

**Figure S35.** Representative cyclic voltammograms of  $[\text{Cu}(\text{DO}_2\text{S}_2\text{Py})]^{2+}$  ( $I = 0.15 \text{ M NaNO}_3$ ,  $T = 25^\circ\text{C}$ ,  $C_{[\text{Cu}(\text{DO}_2\text{S}_2\text{Py})]^{2+}} = 8 \cdot 10^{-4} \text{ M}$ ,  $\text{pH} = 7$ ) acquired at a scan rate of  $0.1 \text{ V/s}$ .

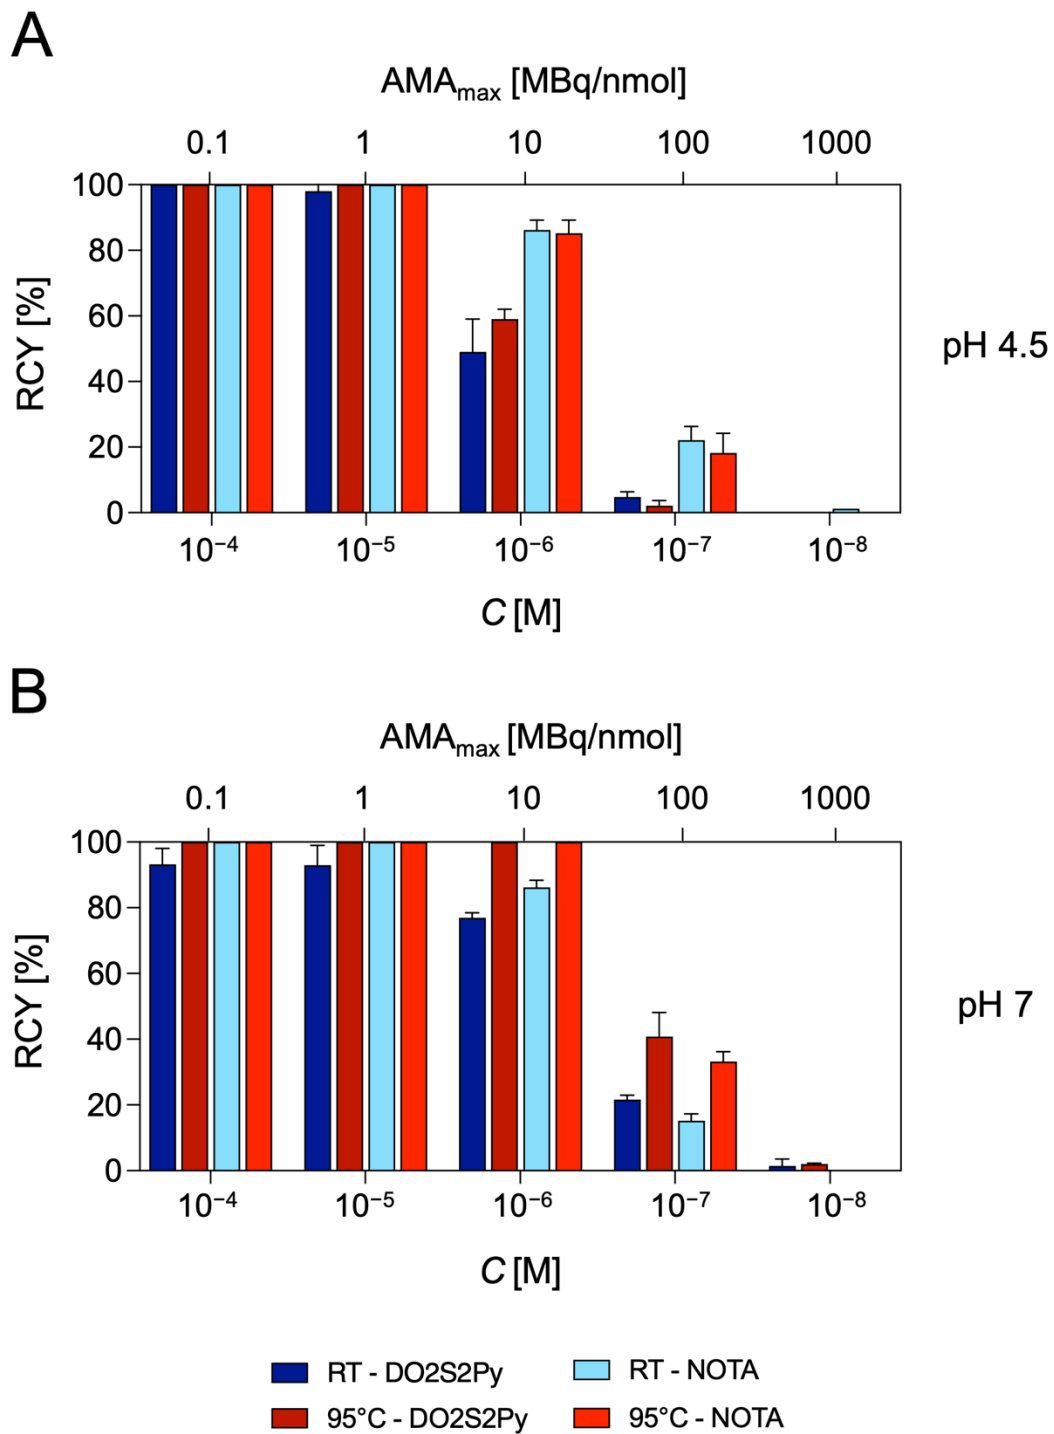

**Figure S36.** Concentration- and temperature-dependent  $[^{64}\text{Cu}]\text{Cu}^{2+}$  radiolabeling with DO2S2Py and NOTA at (A) pH 4.5 and (B) pH 7 (5 min reaction time).

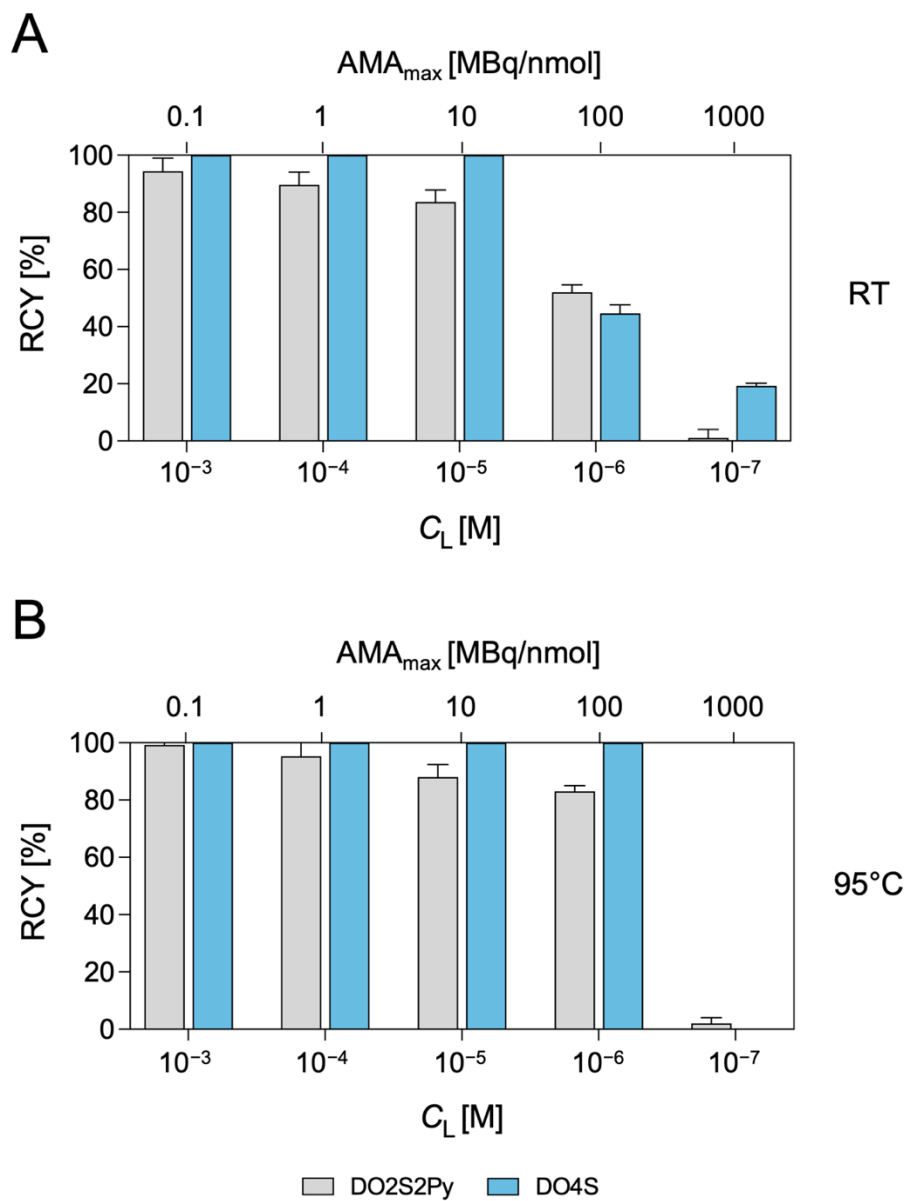

**Figure S37.** Concentration-dependent [<sup>111</sup>Ag]Ag<sup>+</sup> radiolabeling with DO2S2Py and DO4S (pH 7.4, 5 min reaction time) at (A) RT and (B) 95°C.

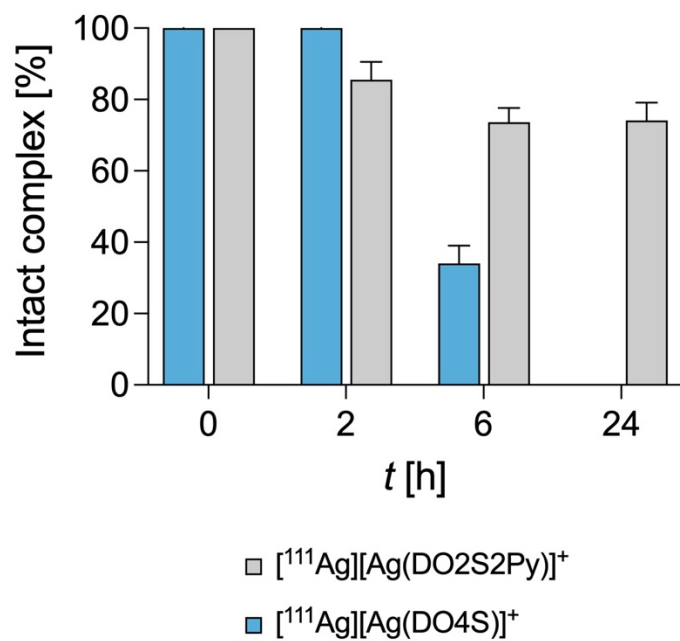

**Figure S38.** Comparison of the integrity of  $[^{111}\text{Ag}][\text{Ag}(\text{DO2S2Py})]^+$  and  $[^{111}\text{Ag}][\text{Ag}(\text{DO4S})]^+$  in human serum.

## **Supporting Tables**

**Table S1.** Comparison of  $pK_a$  values of DO2S2Py, DO4S and pyridine-containing cyclen-based chelators.

|        | <b>DO4S</b> | <b>DO2S2Py</b>                                                                         | <b>Cyclen-Py</b> <sup>(d)</sup> | <b>Cyclen-2Py</b> <sup>(e)</sup> | <b>Cyclen-4Py</b> <sup>(f)</sup> |
|--------|-------------|----------------------------------------------------------------------------------------|---------------------------------|----------------------------------|----------------------------------|
| $pK_a$ | 10.14       | 10.76 ± 0.03 <sup>(a)</sup><br>10.8 ± 0.1 <sup>(b)</sup>                               | 10.6                            | 9.90                             | 10.05                            |
|        | 7.29        | 7.75 ± 0.09 <sup>(a)</sup><br>7.82 ± 0.05 <sup>(b)</sup><br>7.78 ± 0.1 <sup>(c)</sup>  | 9.77                            | 8.40                             | 7.53                             |
|        | 1.9         | 3.10 ± 0.06 <sup>(a)</sup><br>3.19 ± 0.05 <sup>(b)</sup><br>3.33 ± 0.02 <sup>(c)</sup> | 3.42                            | 3.75                             | 3.54                             |
|        | -           | 2.6 ± 0.1 <sup>(a)</sup><br>2.53 ± 0.02 <sup>(c)</sup>                                 | < 3                             | 2.50                             | 2.23                             |

a) Determined by pH-dependent <sup>1</sup>H NMR titrations.

b) Determined by pH-potentiometric titrations.

c) Determined by pH-dependent UV-Vis titrations.

d) Obtained from ref <sup>3</sup> ( $I = 1 \text{ M KNO}_3$ ).

e) Obtained from ref <sup>4</sup> ( $I = 0.10 \text{ M NMe}_4\text{NO}_3$ ).

f) Obtained from ref <sup>5</sup>.

**Table S2.** Comparison of the approximate time required to reach equilibrium during the reaction between  $\text{Cu}^{2+}$  and different S-containing ligands ( $C_{\text{Cu}} = C_{\text{L}} = 1.0 \cdot 10^{-4} \text{ M}$ ).<sup>6</sup>

| <b>pH</b> | <b>DO2S2Py</b> | <b>DO4S</b> | <b>DO3SAm</b> | <b>DO2A2S</b> |
|-----------|----------------|-------------|---------------|---------------|
| 2         | < 10 sec       | 10 d        | 10 d          | 4 h           |
| 4.5/4.8   | < 10 sec       | 50 min      | 60 min        | < 10 sec      |
| 7         | < 10 sec       | < 10 sec    | < 10 sec      | < 10 sec      |

**Table S3.** EPR parameters obtained by the simulation of EPR spectra of  $[\text{Cu}(\text{DO2S2Py})]^{2+}$  in frozen solution. Coupling values are shown in  $10^{-4} \text{ cm}^{-1}$  values.

| Complex                            | Anisotropic parameters <sup>(a)</sup> |                 |             |                 | Calculated <sup>(b)</sup> | Coordination                             | Ref.      |
|------------------------------------|---------------------------------------|-----------------|-------------|-----------------|---------------------------|------------------------------------------|-----------|
|                                    | $g_{\perp}$                           | $g_{\parallel}$ | $A_{\perp}$ | $A_{\parallel}$ | $g_{0,\text{calc}}$       |                                          |           |
| <b>[Cu(DO2S2Py)]</b>               | 2.067                                 | 2.248           |             | 144             | 2.127                     | [4N <sub>cy</sub> ,2N <sub>py</sub> ]    | This work |
| <b>[Cu(DO2A2S)]</b>                | 2.075                                 | 2.272           | 24.5        | 142.8           | 2.141                     | [2N,2O,2N <sub>ax</sub> ]                | 7         |
| <b>[Cu(DO3S)]<sup>2+</sup> (1)</b> | 2.036                                 | 2.184           | 15.6        | 179.3           | 2.085                     | [4N]                                     | 7         |
| <b>[Cu(DO3S)]<sup>2+</sup> (2)</b> | 2.048, 2.058                          | 2.209           | 20.3, 23.5  | 171.2           | 2.105                     | [4N,S <sub>ax</sub> ]                    | 7         |
| <b>[Cu(Cpy)<sub>2</sub>]</b>       | 2.07                                  | 2.19            |             | 193             | 2.11                      | [4N,2N <sub>py</sub> ]                   | 4         |
| <b>[Cu(CRpy)<sub>2</sub>]</b>      | 2.05                                  | 2.22            |             | 140             | 2.11                      | [2N,2N <sub>py</sub> ,2N <sub>ax</sub> ] | 4         |

<sup>(a)</sup> The experimental errors were  $\pm 0.002$  for  $g_{\perp}$  and  $\pm 0.001$  for  $g_{\parallel}$ ,  $\pm 2 \cdot 10^{-4} \text{ cm}^{-1}$  for  $A_{\perp}$  and  $\pm 1 \cdot 10^{-4} \text{ cm}^{-1}$  for  $A_{\parallel}$ .

<sup>(b)</sup> Calculated by the equation  $g_{0,\text{calc}} = (2g_{\perp} + g_{\parallel})/3$ .

**Table S4.** Most relevant distances (Å) between the metal centers and the different coordinated atoms of the DO2S2Py ligand.

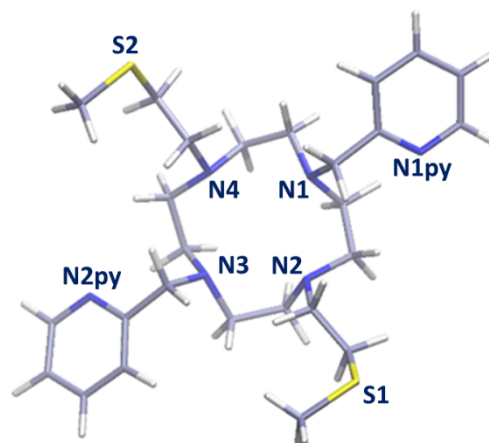

|                  | [Cu <sup>2+</sup> -4N <sub>cy</sub> 2N <sub>py</sub> ] | [Cu <sup>2+</sup> -4N <sub>cy</sub> 1N <sub>py</sub> ] | [Cu <sup>2+</sup> -4N <sub>cy</sub> 1S] | [Cu <sup>2+</sup> -4N <sub>cy</sub> ] | [Ag <sup>+</sup> -3N <sub>cy</sub> 2N <sub>py</sub> 1S] | [Ag <sup>+</sup> -4N <sub>cy</sub> 2N <sub>py</sub> ] | [Ag <sup>+</sup> -4N <sub>cy</sub> 2S] | [Cu <sup>+</sup> -3N <sub>cy</sub> 1N <sub>py</sub> ] | [Cu <sup>+</sup> -3N <sub>cy</sub> 1S] | [Cu <sup>+</sup> -4N <sub>cy</sub> ] |
|------------------|--------------------------------------------------------|--------------------------------------------------------|-----------------------------------------|---------------------------------------|---------------------------------------------------------|-------------------------------------------------------|----------------------------------------|-------------------------------------------------------|----------------------------------------|--------------------------------------|
| N1               | <b>2.064</b>                                           | <b>2.065</b>                                           | <b>2.072</b>                            | <b>2.011</b>                          | <b>2.633</b>                                            | <b>2.513</b>                                          | <b>2.554</b>                           | <b>2.450</b>                                          | <b>2.384</b>                           | <b>2.192</b>                         |
| N2               | <b>2.291</b>                                           | <b>2.104</b>                                           | <b>2.087</b>                            | <b>2.026</b>                          | <b>2.586</b>                                            | <b>2.812</b>                                          | <b>2.725</b>                           | <b>2.167</b>                                          | <b>2.251</b>                           | <b>2.230</b>                         |
| N3               | <b>2.238</b>                                           | <b>2.063</b>                                           | <b>2.068</b>                            | <b>2.012</b>                          | 2.997                                                   | <b>2.512</b>                                          | <b>2.555</b>                           | 2.668                                                 | 2.797                                  | <b>2.193</b>                         |
| N4               | <b>3.158</b>                                           | <b>2.121</b>                                           | <b>2.098</b>                            | <b>2.023</b>                          | <b>2.613</b>                                            | <b>2.826</b>                                          | <b>2.669</b>                           | <b>2.300</b>                                          | <b>2.148</b>                           | <b>2.235</b>                         |
| N1 <sub>py</sub> | <b>2.027</b>                                           | <b>2.189</b>                                           | 5.149                                   | 4.963                                 | <b>2.654</b>                                            | <b>2.449</b>                                          | 4.870                                  | <b>2.083</b>                                          | 4.310                                  | 5.167                                |
| N2 <sub>py</sub> | <b>2.000</b>                                           | 3.502                                                  | 3.748                                   | 4.984                                 | <b>2.591</b>                                            | <b>2.446</b>                                          | 3.919                                  | 3.037                                                 | 3.492                                  | 5.169                                |
| S1               | 4.049                                                  | 5.340                                                  | <b>2.638</b>                            | 5.748                                 | <b>2.725</b>                                            | 3.795                                                 | <b>2.811</b>                           | 5.494                                                 | <b>2.374</b>                           | 5.889                                |
| S2               | 4.458                                                  | 5.273                                                  | 3.902                                   | 5.733                                 | 5.706                                                   | 3.791                                                 | <b>2.768</b>                           | 5.241                                                 | 4.964                                  | 5.886                                |

**Table S5.** Excitation energies  $\Delta E$  (eV), absorption wavelength  $\lambda$  (nm), oscillator strength ( $f$ ) and MO contribution % for selected transitions (Tr) of  $[\text{Cu}^{2+}-4\text{N}_{\text{cy}}2\text{N}_{\text{py}}]$  complex calculated by B3PW91

| Tr <sup>a</sup> | Band | $\Delta E$ | $\lambda$ | $f^{(a)}$ | MO contribution <sup>(b)</sup>                                                      |
|-----------------|------|------------|-----------|-----------|-------------------------------------------------------------------------------------|
| Tr1             | I    | 1.93       | 641       | 0.0006    | H-13 <sub>β</sub> → L <sub>β</sub> 33%<br>H-9 <sub>β</sub> → L <sub>β</sub> 15%     |
| Tr2             | II   | 3.86       | 321       | 0.0184    | H-3 <sub>β</sub> → L <sub>β</sub> 15%                                               |
| Tr3             |      | 4.13       | 300       | 0.0281    | H-6 <sub>β</sub> → L <sub>β</sub> 22%                                               |
| Tr4             | III  | 4.41       | 281       | 0.0955    | H-7 <sub>β</sub> → L <sub>β</sub> 41%<br>H-10 <sub>β</sub> → L <sub>β</sub> 18%     |
| Tr5             |      | 4.81       | 258       | 0.0183    | H-4 <sub>α</sub> → L+1 <sub>α</sub> 41%,<br>H-3 <sub>β</sub> → L+2 <sub>β</sub> 22% |
| Tr6             |      | 5.24       | 237       | 0.0654    | H-5 <sub>α</sub> → L <sub>α</sub> 33%<br>H-4 <sub>β</sub> → L+1 <sub>β</sub> 28%    |
| Tr7             |      | 5.34       | 232       | 0.0187    | H-5 <sub>α</sub> → L+1 <sub>α</sub> 18%<br>H-6 <sub>β</sub> → L+1 <sub>β</sub> 13%  |
| Tr8             |      | 5.41       | 229       | 0.0250    | H-17 <sub>β</sub> → L <sub>β</sub> 46%                                              |
| Tr9             |      | 5.49       | 226       | 0.0207    | H-6 <sub>α</sub> → L+1 <sub>α</sub> 20%,<br>H-3 <sub>β</sub> → L+4 <sub>β</sub> 34% |
| Tr10            |      | 5.51       | 225       | 0.0022    | H-15 <sub>β</sub> → L <sub>β</sub> 40%<br>H-14 <sub>β</sub> → L <sub>β</sub> 25%    |

Tr = transition number.

(a) Only vertical transitions with oscillator strength greater than 0.0180 are reported, except for the most red-shifted transition (Tr1).

(b) Only contributions larger than 15% are reported.  
functional.

**Table S6.** Comparison of the acid decomplexation half-life ( ${}^d t_{1/2}$ ) of the  $\text{Cu}^{2+}$  complexes of DO2S2Py and other S-containing chelators ( ${}^d k$ ,  ${}^d k_2$  determined by fitting the experimental data with the equation  ${}^d k_{\text{obs}} = {}^d k[\text{H}^+]$  for DO2S2Py, DO4S, DO2A2S, and TE4S or  ${}^d k_{\text{obs}} = {}^d k[\text{H}^+] + {}^d k_2[\text{H}^+]^2$  for TRI4S).<sup>6</sup>

| [HCl]<br>[M]                                     | ${}^d t_{1/2}$                |                                 |                               |                |                                 |
|--------------------------------------------------|-------------------------------|---------------------------------|-------------------------------|----------------|---------------------------------|
|                                                  | DO4S<br>[min]                 | DO2A2S<br>[h]                   | TRI4S<br>[min]                | TE4S<br>[min]  | DO2S2Py<br>[min]                |
| 0.1                                              | 254                           | 17.8                            | 50.4                          | 1.0            | 141.5                           |
| 0.2                                              | 118                           | 8.8                             | 3.8                           | 0.9            | 80.1                            |
| 0.4                                              | 58.3                          | 4.0                             | 1.4                           | 0.7            | 43.5                            |
| 0.6                                              | 35.3                          | 2.9                             | 0.6                           |                | 31.7                            |
| 0.8                                              | 25.5                          | 2.3                             | 0.4                           | < 30 sec       | 26.7                            |
| 1.0                                              | 19.4                          | 1.8                             | 0.3                           |                | 22.4                            |
| ${}^d k$ [ $\text{M}^{-1}\cdot\text{s}^{-1}$ ]   | $(5.7 \pm 0.1) \cdot 10^{-4}$ | $(1.04 \pm 0.02) \cdot 10^{-4}$ | $(1.7 \pm 0.6) \cdot 10^{-2}$ | $\sim 10^{-2}$ | $(5.32 \pm 0.05) \cdot 10^{-4}$ |
| ${}^d k_2$ [ $\text{M}^{-1}\cdot\text{s}^{-1}$ ] | -                             | -                               | $(1.9 \pm 0.7) \cdot 10^{-2}$ | -              | -                               |

## References

- 1 M. Tosato, M. Asti, M. Dalla Tiezza, L. Orian, D. Häussinger, R. Vogel, U. Köster, M. Jensen, A. Andrighetto, P. Pastore and V. Di Marco, *Inorg. Chem.*, 2020, **59**, 10907–10919.
- 2 M. Tosato, S. Franchi, M. Dalla Tiezza, L. Orian, T. Gyr, A. Alker, G. Zanoni, P. Pastore, A. Andrighetto, U. Köster, M. Jensen, H. Mäcke, M. Asti and V. Di Marco, *Inorg. Chem.*, 2023, **62**, 20777–20790.
- 3 S. El Ghachtouli, C. Cadiou, I. Déchamps-Olivier, F. Chuburu, M. Aplincourt and T. Roisnel, *Eur. J. Inorg. Chem.*, 2006, **2006**, 3472–3481.
- 4 N. Bernier, J. Costa, R. Delgado, V. Félix, G. Royal and R. Tripier, *Dalton Trans.*, 2011, **40**, 4514–4526.
- 5 B. L. McNeil, K. J. Kadassery, A. W. McDonagh, W. Zhou, P. Schaffer, J. J. Wilson and C. F. Ramogida, *Inorg. Chem.*, 2022, **61**, 9638–9649.
- 6 M. Tosato, M. Pelosato, S. Franchi, A. A. Isse, N. V. May, G. Zanoni, F. Mancin, P. Pastore, D. Badocco, M. Asti and V. Di Marco, *New J Chem*, 2022, **46**, 10012–10025.
- 7 M. Tosato, M. Dalla Tiezza, N. V. May, A. A. Isse, S. Nardella, L. Orian, M. Verona, C. Vaccarin, A. Alker, H. Mäcke, P. Pastore and V. Di Marco, *Inorg. Chem.*, 2021, **60**, 11530–11547.
